# Supplementary material for: UK multiple sclerosis risk-sharing scheme: a new natural history dataset and an improved Markov model
Source: PubMed Central journal article supplement — BMJ Open. 2014 Jan 17;4(1):e004073. doi: 10.1136/bmjopen-2013-004073 (PMC3902459; doi:10.1136/bmjopen-2013-004073), 2014-01-17
Supplement: bmjopen-2013-004073.draft_revisions.pdf [file bmjopen-2013-004073.draft_revisions.pdf]

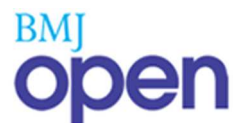

## UK Multiple Sclerosis Risk-sharing Scheme: developing an improved analysis plan

|                                 |                                                                                                                                                                                                                                                                                                                                                                                                                                                                                                                                      |
|---------------------------------|--------------------------------------------------------------------------------------------------------------------------------------------------------------------------------------------------------------------------------------------------------------------------------------------------------------------------------------------------------------------------------------------------------------------------------------------------------------------------------------------------------------------------------------|
| Journal:                        | <i>BMJ Open</i>                                                                                                                                                                                                                                                                                                                                                                                                                                                                                                                      |
| Manuscript ID:                  | bmjopen-2013-004073                                                                                                                                                                                                                                                                                                                                                                                                                                                                                                                  |
| Article Type:                   | Research                                                                                                                                                                                                                                                                                                                                                                                                                                                                                                                             |
| Date Submitted by the Author:   | 19-Sep-2013                                                                                                                                                                                                                                                                                                                                                                                                                                                                                                                          |
| Complete List of Authors:       | Palace, Jacqueline; John Radcliffe Hospital, Clinical Neurology<br>Bregenzer, Thomas; PAREXEL International, Biostatistics Unit<br>Tremlett, Helen; University Of British Columbia, Medicine (Neurology)<br>Oger, Joel; University Of British Columbia, Division of Neurology<br>Zhu, Feng; University Of British Columbia, Medicine (Neurology)<br>Boggild, Mike; The Townsville Hospital, Neurology Department<br>Duddy, Martin; The Newcastle upon Tyne Hospitals, Neurology Department<br>Dobson, Charles; Department of Health, |
| <b>Primary Subject Heading</b>: | Neurology                                                                                                                                                                                                                                                                                                                                                                                                                                                                                                                            |
| Secondary Subject Heading:      | Health economics, Pharmacology and therapeutics, Research methods                                                                                                                                                                                                                                                                                                                                                                                                                                                                    |
| Keywords:                       | Multiple sclerosis < NEUROLOGY, quality of life, risk sharing scheme, interferon-beta, glatiramer acetate, Markov model                                                                                                                                                                                                                                                                                                                                                                                                              |
|                                 |                                                                                                                                                                                                                                                                                                                                                                                                                                                                                                                                      |

SCHOLARONE™  
Manuscripts

1  
2  
3  
4  
5  
6  
7  
8  
9  
10  
11  
12  
13  
14  
15  
16  
17  
18  
19  
20  
21  
22  
23  
24  
25  
26  
27  
28  
29  
30  
31  
32  
33  
34  
35  
36  
37  
38  
39  
40  
41  
42  
43  
44  
45  
46  
47  
48  
49  
50  
51  
52  
53  
54  
55  
56  
57  
58  
59  
60

UK Multiple Sclerosis Risk-sharing Scheme: developing an improved analysis plan

For peer review only

1  
2  
3  
4  
5 The lead author\* affirms that this manuscript is an honest, accurate, and transparent account of the  
6 study being reported; that no important aspects of the study have been omitted; and that any  
7 discrepancies from the study as planned (and, if relevant, registered) have been explained.  
8  
9  
10  
11  
12  
13  
14  
15  
16  
17  
18  
19  
20  
21  
22  
23  
24  
25  
26  
27  
28  
29  
30  
31  
32  
33  
34  
35  
36  
37  
38  
39  
40  
41  
42  
43  
44  
45  
46  
47  
48  
49  
50  
51  
52  
53  
54  
55  
56  
57  
58  
59  
60

1  
2  
3 The Corresponding Author has the right to grant on behalf of all authors and does grant on behalf of  
4 all authors, a worldwide licence to the Publishers and its licensees in perpetuity, in all forms, formats  
5 and media (whether known now or created in the future), to i) publish, reproduce, distribute, display  
6 and store the Contribution, ii) translate the Contribution into other languages, create adaptations,  
7 reprints, include within collections and create summaries, extracts and/or, abstracts of the  
8 Contribution, iii) create any other derivative work(s) based on the Contribution, iv) to exploit all  
9 subsidiary rights in the Contribution, v) the inclusion of electronic links from the Contribution to third  
10 party material where-ever it may be located; and, vi) licence any third party to do any or all of the  
11 above.  
12  
13  
14  
15  
16  
17  
18  
19  
20  
21  
22  
23  
24  
25

26 **We have read and understood the BMJ Group policy on declaration of interests and declare**  
27 **the following interests:**  
28

29  
30 Jacqueline Palace serves on the scientific advisory board for Charcot Foundation, and has performed  
31 advisory work for Biogen Idec, Merck Serono Ltd, Bayer Schering Pharma, Novartis Pharmaceuticals  
32 UK Ltd, Teva Pharmaceutical Industries Ltd, Gilenya, Ono Pharmaceutical Co Ltd, Primary i-research,  
33 Chugai Pharma Europe and CI Consulting. She receives research support from the MS Society,  
34 QIDIS, Merck Serono Ltd, Novartis Pharmaceuticals and Bayer Schering Pharma, plus conference  
35 expenses from Novartis and Merck Serono Ltd.  
36  
37  
38  
39  
40  
41

42 Thomas Bregenzer – no financial interests to declare  
43  
44

45 Helen Tremlett is funded by the Multiple Sclerosis Society of Canada (Don Paty Career Development  
46 Award), Michael Smith Foundation for Health Research and is the Canada Research Chair for  
47 Neuroepidemiology and Multiple Sclerosis. She has received: research support from the US National  
48 Multiple Sclerosis Society, CIHR, and UK MS Trust; speaker honoraria and/or travel expenses to  
49 attend conferences from the Consortium of MS Centres, US National MS Society, the University of  
50 British Columbia Multiple Sclerosis Research Program, Bayer Pharmaceutical (speaker, 2010,  
51 honoraria declined), Teva Pharmaceuticals (speaker 2011), ECTRIMS (2011, 2012), UK MS Trust  
52 (2011), and the Chesapeake Health Education Program, US Veterans Affairs (2012, honorarium  
53  
54  
55  
56  
57  
58  
59  
60

1  
2  
3 declined), Novartis Canada (2012) and the US National MS Society (2012, honorarium declined).

4 Unless otherwise stated, all speaker honoraria are either donated to an MS charity or to an  
5  
6 unrestricted grant for use by her research group.  
7

8  
9 Joel Oger is funded by the University of British Columbia and has received grants and contracts from  
10 Biogen-Idec, Bayer, EMD Serono, Merk Serono. He has received speaker fees, Advisory Board  
11 membership and travel grants from Bayer, Novartis, Serono and the Ministry of Health of British  
12 Columbia. His lab is partially funded by the Christopher Foundation .  
13  
14

15  
16  
17 Feng Zhu – no financial interests to declare  
18

19  
20 Mike Boggild sits on advisory boards for Bio CSL, genzyme & Biogen Idec. Recieved sponsorship to  
21 attend international meetings from Novartis & BioCSL. Department has received funding to develop  
22 services from Biogen Idec, Genzyme and Novartis.  
23  
24

25  
26 Martin Duddy over the past 5 years MD has received speaker honoraria, consulting fees and travel  
27 grants from, Bayer, BiogenIdec, Novartis, Merck-Serono and Teva  
28  
29

30  
31 Charles Dobson – no financial interests to declare  
32  
33  
34  
35  
36  
37  
38  
39  
40  
41  
42  
43  
44  
45  
46  
47  
48  
49  
50  
51  
52  
53  
54  
55  
56  
57  
58  
59  
60

## **Abstract**

### Introduction

In 2002, the National Institute for Clinical Excellence concluded that the multiple sclerosis disease modifying therapies; interferon- $\beta$  and glatiramer acetate, were not cost-effective over the short term but recognised uncertainties over longer term modelling. The UK Risk-sharing Scheme (RSS) was thus set up to ensure cost-effective provision by measuring long-term disability progression in patients prescribed these therapies, and comparing with a modelled natural history cohort. It was agreed that the price of the drugs would be adjusted, if necessary, at each 2 year analysis to achieve the predefined cost per QALY target. The first 2 year analysis identified problems with the model, mainly focussed on unforeseen limitations of the chosen natural history database. This paper outlines the identification of a more suitable untreated cohort and the work undertaken to improve the Markov model.

### Methods

All known international databases were screened to identify the most suitable comparator to the UK RSS cohort.

Using transition probabilities from the selected cohort, the original discrete Markov model was compared to a continuous model, with and without the addition of baseline covariates, looking for the best predictive model of the actual progression of the cohort from baseline data alone, assessed by “goodness-of-fit” analysis. .

### Analysis

The British Columbia Multiple Sclerosis database was selected as most suitable for the scheme’s purpose.

A continuous Markov model with “age at onset” as a binary covariate was deemed the most suitable model for future RSS analysis, providing the added benefit of allowing the use of data previously excluded due to time-window constraints.

### Conclusion

1  
2  
3 A new statistical analysis plan has been developed for the UK RSS which will be used for price  
4 adjustment calculations for future RSS analyses. We believe this will provide a more valid and robust  
5 methodology upon which to base future decisions.  
6  
7  
8  
9  
10  
11  
12  
13  
14  
15  
16  
17  
18  
19  
20  
21  
22  
23  
24  
25  
26  
27  
28  
29  
30  
31  
32  
33  
34  
35  
36  
37  
38  
39  
40  
41  
42  
43  
44  
45  
46  
47  
48  
49  
50  
51  
52  
53  
54  
55  
56  
57  
58  
59  
60

For peer review only

### Strengths and limitations of this study

#### Strengths of this study:

- The validation of an analysis model for observational studies using natural history datasets as a comparator.
- The identification of an MS analysis model which can be applied over a 10 year follow up period.
- The identification of an analysis model which can use data collected at anytime point within the follow up period.
- The identification a model which uses data from a set of MS patients to predict outcomes in a different set of MS patients and in a different MS cohort.

#### Limitations of this study:

- This model cannot address unseen variations occurring due to the lack of randomisation.
- This model cannot address the bias in outcome due to lost to follow up patients
- Data from the natural history cohort of untreated patients was collected prior to that of the treated cohort and this model cannot adjust for any changes in the background outcome of untreated patients.
- Different techniques to assess long term effects such as propensity modelling cannot be directly compared to this methodology.



## Introduction

In January 2002, the UK's National Institute of Clinical Excellence (NICE) opted not to recommend the use of the disease modifying therapies (DMTs) interferon- $\beta$  and glatiramer acetate for multiple sclerosis (MS) on the basis of cost-effectiveness analyses using data derived from the pivotal 2-3 year randomised controlled trials.<sup>1</sup> However, they recognised that uncertainties over the assumptions made in the modelling could unpredictably influence the long-term estimates of cost effectiveness. Thus in February 2002 the UK's Department of Health launched the 'Risk-sharing Scheme' (RSS)<sup>2</sup> with a circular entitled the "Cost effective provision of disease modifying therapies for people with multiple sclerosis" in collaboration with the Association of British Neurologists (ABN), the MS Trust, the MS Society and the pharmaceutical companies manufacturing interferon- $\beta$  and glatiramer acetate. Between 2002 and 2005 the scheme enrolled over 5,000 MS patients initiating a DMT in the UK, with the aim of measuring their disability annually over a ten year period.

The original cost effectiveness model<sup>3</sup> produced a target outcome based upon transition probabilities obtained from a pre-existing natural history (DMT naive) cohort of patients from London, Ontario, Canada along with hazard ratios from the pivotal randomised control trials (unpublished data provided to the Department of Health by the manufacturers). Complementary quality of life data collected by the MS Trust<sup>4</sup> and cost data from Kobelt et al<sup>5</sup> were used to populate the cost-effectiveness model. The targets ensured that the UK's National Health Service benchmark of £36,000 (46,000 Euro / 56,000 US dollars) per quality adjusted life year (QALY) was reached over a 20 year projection, based on a planned 10 year follow up period within the RSS with 2 yearly interim analyses. At the start of the scheme, the drug costs were reduced where necessary to ensure the predicted targets were on course to reach the 20 year cost effectiveness target.

The two year analysis revealed significant inconsistencies in a number of sensitivity analyses.<sup>6</sup> Depending on the underlying assumptions, some analyses suggested that observed disability progression in the treated cohort was worse than that predicted from the historical untreated cohort while others demonstrated the contrary effect. A detrimental effect of DMT did not match the described effect on short term, 2-3 year, disability seen in the randomised placebo controlled trials.<sup>7-12</sup> With the predetermined analytical approach (based on a discrete Markov model) appearing to produce unreliable results with wide variation, a decision was made to postpone any decision on cost

1  
2  
3 effectiveness to allow for a reappraisal of the process and to reconsider whether the statistical models  
4 and control data chosen were “fit for purpose.”  
5  
6

7  
8 In retrospect, both the control data set and analysis model selected, when setting up the RSS, were  
9 found to have intrinsic flaws that made them unsuitable for the task.<sup>6</sup> The natural history cohort (from  
10 London, Ontario, Canada) was unexpectedly found to contain retrospectively smoothed disability data  
11 (rather than actual, real-time collected disability scores), censoring any improvement in EDSS.  
12

13  
14 Comparing our uncensored treated cohort to data retrospectively smoothed in this way would have  
15 the effect of unpredictably underestimating any treatment effect. In addition, individual-level patient  
16 data were not available from the London, Ontario cohort, which prevented precise baseline matching  
17 between the two cohorts, limiting our validation of the underlying (Markov) model for disease  
18 progression. Furthermore, there were only 342 patients matching the ABN prescribing criteria from  
19 which to generate the models.  
20  
21

22  
23 This paper outlines the development of a more appropriate analysis plan and the choice of a cohort fit  
24 for the needs of the scheme. The method described will be applied in the 4 and 6 year cost-  
25 effectiveness analyses. The analysis plan was approved by the scheme’s independent Scientific  
26 Advisory Group in December 2012 in advance of unlocking the newly collected 4 and 6 year UK Risk-  
27 sharing Scheme data planned for autumn 2013.  
28  
29

## 30 **Methods**

### 31 Identification of a new multiple sclerosis natural history dataset

32  
33 An initial screen to identify all published natural history data sets was performed by reviewing the  
34 literature and consulting with international experts. Selection criteria included availability of Expanded  
35 Disability Status Scale (EDSS) score measurements and access to the unprocessed (actual) scores  
36 (i.e. no data smoothing or other data manipulation). Other factors considered were size of the  
37 database, prospective data collection and length of follow-up, and the broader setting such as a close  
38 match to the UK in terms of the health system and MS prevalence in the underlying population. The  
39 British Columbia Multiple Sclerosis (BCMS) database, Canada (est. 1980) was identified as the best  
40 natural history comparator cohort for our purposes.<sup>13,14</sup> In this dataset – as in the RSS – actual EDSS  
41 scores were recorded prospectively. It is estimated to capture 80% of the BC MS population<sup>15,16</sup> and  
42  
43  
44  
45  
46  
47  
48  
49  
50  
51  
52  
53  
54  
55  
56  
57  
58  
59  
60

1  
2  
3 as such is considered representative of the wider MS population. EDSS scores were recorded by MS  
4 specialist neurologists after a face-to-face consultation with the patient; this typically occurred at the  
5 annual MS clinic visit. Patient data was not truncated if secondary-progressive MS was reached; i.e.  
6 all relapse-onset MS patients and their respective EDSS scores were considered eligible. By 2004,  
7 the database had records for over 5900 patients spanning 28 years (>25,000 cumulative years) of  
8 prospective follow-up. Until 1996 DMTs were not widely available in British Columbia.  
9

#### 10 11 12 Patient and data selection from the BCMS database.

13  
14  
15 In order to generate relevant data for our needs, patients were only selected from the BCMS  
16 database if they fulfilled the 2001 Association of British Neurologists (ABN) criteria for interferon- $\beta$  and  
17 glatiramer acetate (IFN-  $\beta$ /GA) use (adapted from Appendix IV Health Service Circular 2002/004),  
18 defined as: EDSS $\leq$ 6.5;  $\geq$ 18 years old; two relapses in the last 2 calendar years.  
19

20  
21  
22 Baseline for each patient was the 'first eligibility date,' meaning the first date at which a patient fulfilled  
23 the ABN eligibility criteria. Only patients with definite MS (Poser criteria<sup>17</sup>) and a minimum of two  
24 EDSS scores at least 9 months apart were considered.  
25

26  
27 In order to be comparable with the RSS data the following adjustments and selection were applied:  
28

29  
30 1) EDSS scores taken during a relapse or when disability was affected by other factors considered  
31 largely unrelated to MS (e.g. hip fracture) were excluded.  
32

33  
34 2) For the original discrete Markov model (see below) as well as visual presentation of the yearly  
35 descriptive data (see under results), annual EDSS scores were needed. However, as is typical in  
36 clinical practice, not all visits / EDSS assessments occurred at exactly yearly intervals and the  
37 exclusion of some EDSS scores (e.g. due to a relapse or hip fracture) also affected the availability of  
38 a yearly score. Therefore, data was selected such that only EDSS scores one year apart (+/- three  
39 calendar months) were considered. See appendix 1 for further details.  
40

41  
42 3) For the continuous Markov model, (see below) all eligible EDSS scores were used regardless of  
43 their measurement interval i.e. no yearly data selection, as in (2), was needed.  
44  
45  
46  
47  
48  
49  
50  
51

1  
2  
3 4) All patient data was truncated to the end of 1995 (i.e. the last full year in which the DMTs were not  
4 widely available in BC. Although initially it was planned to truncate individual patient profiles only once  
5 a DMT was initiated (in order to maximise the number of EDSS assessments), even when this  
6 extended past 1995 when treatment would have been available). It became apparent that this  
7 introduced a bias into the data, likely related to 'indication bias,' whereby patients 'doing well' would  
8 be less likely to start a DMT.  
9

### 14 Analysis

15  
16  
17 The primary purpose of the analytical work was to find the best statistical model able to predict EDSS  
18 progression in a natural history cohort based on entry demographic and clinical data. The following  
19 models were applied in the current study and their performances were critically evaluated.  
20  
21

22  
23  
24 a) The discrete Markov model<sup>18</sup> as in the original 2 year analysis<sup>6</sup> i.e. disability scores (EDSS) had to  
25 be measured at discrete, fixed time points.  
26

27  
28 b) A continuous Markov model allowing for EDSS scores to be collected at unevenly spaced time  
29 intervals, as is typical in clinical practice.<sup>19</sup> Such a model also allowed covariates to be included. This  
30 model allows for more complete use of EDSS scores collected at irregular time intervals both in the  
31 BCMS and RSS cohorts.  
32  
33

34  
35  
36 With regard to the "MS course" (i.e. relapsing remitting vs. secondary progressive) as a potential  
37 covariate, we did not distinguish between these disease states when developing the Markov models  
38 because secondary progressive MS is simply a later stage of the relapsing remitting form of the  
39 disease and the transition has considerable overlap.  
40  
41

42  
43  
44 To keep computations feasible, only integer EDSS values were used and fractional values rounded  
45 down (i.e. EDSS 1.5 was scored as 1, 2.5 was scored as 2 etc.). These were referred to as the ten  
46 EDSS 'states' (1-10). Transition probability and intensity matrices as the output of these models were  
47 then used to predict disease progression in terms of EDSS as follows.  
48  
49

### 50 Predicting outcomes in the continuous Markov model (b)

51  
52  
53 A multi-state model algorithm ('R' library 'msm'<sup>19</sup>) allows the EDSS distribution to be predicted at any  
54 time  $t$ . See appendix 2 for further details).  
55  
56  
57  
58  
59  
60

### *Covariates considered in the models*

The selection of potential covariates by the scientific advisory group was based upon; (a) those which were reliably and consistently recorded in both the BCMS and the RSS database and (b) *a priori* knowledge of those associated with the outcome of disability progression. As a result, sex, age at MS symptom onset, as well as disease duration and disability (EDSS) - combined into a Multiple Sclerosis Severity Score (MSSS)<sup>20</sup> - were tested in the continuous Markov model with up to two covariates. In addition, for the more promising models an alternative model was considered with dichotomous covariates (split at the median) replacing the continuous variables. This has the advantage that the resulting model can be formulated as the aggregate of a small number of discrete Markov models, so computations can be carried out without requiring special software.

Critical evaluation of the models was performed using the following validation techniques, with the goal being to identify the most appropriate model to represent the natural progression of MS. See appendix 3 for further details.

- 1) Transition probabilities derived from the complete eligible, BCMS natural history data were applied to the baseline data to predict outcomes over the subsequent 10 years to assess how well it matched the observed data from which the model was derived.
- 2) The BCMS dataset was repeatedly randomly divided into two subsets of equal size, with one half only being used to derive transition probabilities (as in #1). The probabilities derived from this half were then applied to the baseline characteristics of the second half, generating a model whose goodness of fit could be judged against the actual ,observed 10 year disability data of this second half.

### Measuring Goodness of Fit

Goodness of fit was assessed via visual inspection of the graphical displays as well as numerically. These included progression over time (mean EDSS profiles) for the cohort as a whole as well as comparisons with the proportions in a particular EDSS state over time.

1  
2  
3 For the numerical assessment a classical mean square prediction error (weighted root mean square  
4 over years of the prediction error in the average quantity shown, weighted by the number of patients  
5 contributing data in the given year) and the likelihood, resulting from the maximum likelihood  
6 algorithm were calculated for each of the covariate models to allow comparison.  
7  
8  
9

10  
11 This study was approved by the University of British Columbia's Clinical Research Ethics Board (H08-  
12 01544)'  
13

## 14 **Results**

### 15 Data Description

16  
17  
18 The baseline demographics showed the BCMS and RSS cohorts to be remarkably well matched.  
19  
20 Patient characteristics are shown in table 1.  
21

22  
23  
24 The natural history BCMS comparator dataset comprised of 898 patient profiles with 7335 EDSS  
25 scores providing 6357 transitions between consecutive EDSS states, i.e 6357 'events' where EDSS  
26 values were recorded at consecutive visits. In any given "transition," a patient's EDSS could increase,  
27 decrease or stay the same  
28  
29  
30  
31  
32

### 33 Discrete Markov model

34  
35  
36 When applying the discrete Markov model to the BCMS reference data, the goodness of fit was  
37 unsatisfactory, underestimating EDSS in earlier years and overestimating in later years (see figure 1).  
38  
39 Consequently, the discrete Markov model was no longer considered appropriate, and development of  
40 a continuous Markov model was pursued.  
41  
42  
43

### 44 Continuous Markov models

45  
46  
47 The following continuous 10 state Markov models (EDSS 0 to 9), with and without covariates, were  
48 evaluated:  
49

- 50
- 51
- 52 1. Model without covariates
- 53 2. One covariate model with age at onset\*
- 54 3. One covariate model with MSSS\* at baseline
- 55 4. One covariate model with disease duration\* at baseline
- 56 5. One covariate model with sex
- 57
- 58
- 59
- 60

- 1
- 2
- 3 6. Two covariate model: sex and age at onset\*
- 4 7. Two covariate model: MSSS\* at baseline and age at onset\*
- 5
- 6 8. Two covariate model: disease duration\* at baseline and age at onset\*
- 7 - \*two variants were implemented: continuous (original) data and a 'binary' version with the
- 8 median used for categorisation.
- 9

10  
11 There was a systematic deviation with overestimation when the continuous Markov models without  
12 covariates were applied (figure 2). Hence these models were not considered further.

13  
14  
15  
16 After validation was repeated for all covariate models (table 2), it was noted that inclusion of a second  
17 covariate did not reveal any additional benefits. With one covariate, the model with "age at onset" as a  
18 binary covariate was selected because it displayed the smallest -2 log likelihood and minimal EDSS  
19 prediction error, see table 2. Further, the goodness of fit was acceptable when comparing the  
20 predicted and observed EDSS profiles, as shown in Figure 3a. A more detailed comparison of  
21 observed and expected proportions 'per EDSS state' is shown in Figure 3b which confirmed that no  
22 systematic deviations were present which might otherwise have been overlooked. It was concluded  
23 that only random fluctuation remained, and a systematic deviation was no longer visible. When  
24 comparing figure 1 with figures 2 or 3 it should be noted that the former is based on the *annual* EDSS  
25 data which were obtained as described in Appendix 1 while figures 2 and 3 show the EDSS at any  
26 time  $t$ , i.e. not necessarily when an observation was recorded (for details on how to define and  
27 calculate what is the observed EDSS at a given time see Appendix 2).

28  
29  
30 Using this 'best' model, transition probabilities were extracted from half of the BCMS cohort and  
31 applied to the other half. This gave good predictions, with the mean EDSS profiles (observed versus  
32 predicted) being similar to each other and to those of the entire cohort.

33  
34  
35  
36  
37  
38  
39  
40  
41  
42  
43  
44  
45 Finally, further (external) validation was undertaken using a Welsh dataset of untreated MS patients  
46 collated by the Cardiff neurology team. When using the model with "age at onset" as the (only)  
47 binary covariate in a continuous Markov model we observed a pattern of congruence similar to that  
48 visible in figure 3, but limited to the comparatively shorter observation time in the Welsh cohort  
49 (data not shown.) This observation supported our choice of the 'best' model in the sense of finding  
50 an appropriate model for EDSS progression in untreated MS patients.  
51  
52  
53  
54  
55  
56  
57  
58  
59  
60

1  
2  
3  
4  
5  
6 In summary, the continuous Markov model with a single covariate - onset age - was considered the  
7 model of choice to be used in future RSS analysis.  
8  
9

## 10 Discussion

11  
12 This paper outlines the successful identification of a more suitable natural history cohort for the UK  
13 MS risk-sharing scheme, with the British Columbia, Canada dataset now replacing the London,  
14 Ontario, Canada cohort in the RSS analysis plan. The analytical work is based on a Markov model  
15 which has been frequently used for ordinal data from relapsing (remitting) diseases, especially  
16 MS.<sup>21,22,23</sup>  
17  
18  
19  
20  
21

22 Further, because use of the British Columbian data has now allowed access to a richer dataset,  
23 including full access to original, 'real-time' disability (EDSS) assessments, as well as individual  
24 patient-level, we have been able to explore and develop more appropriate approaches. Specifically,  
25 we were able to employ more advanced statistical models, making use of all the available data and  
26 including clinically relevant patient-level characteristics as covariates in order to identify the most  
27 accurate predictive model to be applied to the RSS. Finally, we observed that to minimize 'indication  
28 bias' in relation to initiation of a DMT in the natural history cohort (British Columbia), censoring (data  
29 truncation) was more appropriate at the population (rather than individual) level.  
30  
31  
32  
33  
34  
35  
36  
37

38 Findings from our validation procedures indicate future feasibility with respect to obtaining reliable  
39 cost-effectiveness results in the upcoming 6 year RSS analyses. For instance, visualisation of the  
40 predicted and observed outcomes in the final model showed almost perfect overlap, with a one-  
41 covariate model, with no additional improvements from introducing further covariates. In addition, the  
42 final model was able to predict accurately the MS disease course (disability) in half of the cohort  
43 (randomly selected) having obtained the transition probabilities from the other half. We were also able  
44 to show that the model showed good fit when using the BCMS dataset to predict outcome of an  
45 untreated Welsh cohort. These observations along with the baseline comparability of the BCMS and  
46 the RSS cohorts suggest the transition probabilities from the BCMS cohort within this model can be  
47 used to predict the untreated progression of patients in the RSS.  
48  
49  
50  
51  
52  
53  
54  
55  
56  
57  
58  
59  
60



1  
2  
3 An additional strength of this continuous model is the ability to include all valid disability (EDSS)  
4 assessments, regardless of their exact timing, maximising data usage. We acknowledge the potential  
5 limitations of using of a historical control from a geographically discrete population. It is possible that  
6 the natural history of MS has changed over time or that the BCMS population is not representative of  
7 a UK one. However, in British Columbia, it has been previously shown that disability progression (as  
8 measured by the EDSS) has not substantially changed overtime (1980-2009<sup>24</sup>). Further, we have  
9 previously shown that the use of a 'contemporary' untreated control cohort – i.e. where patients are  
10 potentially eligible for a DMT in an era when the DMTs are readily available, but remain untreated - is  
11 subject to indication bias and thus a historical control cohort, with data collected pre-DMT use, is likely  
12 to be more appropriate.<sup>25</sup>  
13  
14  
15  
16  
17  
18  
19  
20  
21

22 Observational studies, such as the RSS, provide a pragmatic approach when assessing drug  
23 effectiveness in a disease such as MS. Because MS disability accrues over decades, the cost  
24 effectiveness of disease modifying treatments cannot be assessed by short-term randomised  
25 controlled trials. However, observational studies are not without their own unique challenges.  
26 Identifying and validating models to predict the untreated outcome of treated cohorts is a crucial step  
27 to measuring the long-term benefits of MS treatments. MS is the commonest cause of progressive  
28 disability in the western world, thus identification of treatments that might significantly impact long-  
29 term disability outcomes in MS could have major cost and quality of life benefits. Additionally, any  
30 models developed here would be readily transferable to other chronic diseases.  
31  
32  
33  
34  
35  
36  
37  
38  
39

40 In summary, the current model described here will form the basis for calculating the drug cost per  
41 QALY and for informing decisions on price adjustment in order to deliver the treatments cost  
42 effectively to UK MS patients. Further work on repeated measures modelling, testing the models on  
43 other untreated appropriate MS datasets and identifying sensitivity analyses (such as the effect of  
44 drop outs, switching to a different class of DMT and the effects of treatments on backward transitions,  
45 i.e. disability improvements) are also planned.  
46  
47  
48  
49  
50  
51  
52  
53  
54  
55  
56  
57  
58  
59  
60

1  
2  
3 All authors 1) made substantial contributions to the conception and design, acquisition of data, or  
4 analysis and interpretation of data 2) were involved in drafting the article or revising it critically for  
5 important intellectual content and 3) were involved in the final approval of the version to be published.  
6  
7 JP is a clinical lead for the UK risk sharing scheme, inputs into the scientific advisory panel, was  
8 involved in the identification of the alternative dataset, interpretation of the analysis and was involved  
9 in the drafting and revising of the manuscript. TB is the senior statistician in the scheme and the  
10 analysis of this work, was involved in the drafting and revision of this manuscript. HT, FZ and JO were  
11 responsible for the preparation of the BCMS dataset, analysis of the data, and drafting and revision  
12 of the manuscript, MB was a clinical lead for the UK risk sharing scheme, input into the scientific  
13 advisory panel, was involved in the identification of the alternative dataset, interpretation of the  
14 analysis and was involved in the drafting and revising of the manuscript, MD is a clinical lead for the  
15 UK risk sharing scheme, inputs into the scientific advisory panel, was involved in the interpretation of  
16 the analysis and was involved in the drafting and revising of the manuscript, CD is a department of  
17 health advisor for the scheme, inputs into the scientific advisory panel, and was involved in the  
18 analysis of the data, its interpretation and was involved in the drafting and revising of the manuscript.  
19  
20  
21  
22  
23  
24  
25  
26  
27  
28  
29  
30  
31  
32  
33  
34  
35  
36  
37  
38  
39  
40  
41  
42  
43  
44  
45  
46  
47  
48  
49  
50  
51  
52  
53  
54  
55  
56  
57  
58  
59  
60

## Acknowledgements

At the outset of the Risk-sharing Scheme agreement was reached between the UK Department of Health and the four manufacturers of the DMTs that all costs for this research project would be split 72 centres participated in the collection of data for the Risk-sharing Scheme from across the UK. Data was collected over a 10 year period and thus changes have been seen within the clinical teams. The authors are grateful to all the clinicians for the work undertaken at the centres which made the RSS possible. A list of the centres can be found at <http://www.mstrust.org.uk/research/risksharingscheme/>

The British Columbia MS (BCMS) database was created by Donald Paty FRCPC and Donald Studney MD FRCPC and maintained over the years by grants from various sources, including the MS Society of Canada, the MS/MRI Research Group, the US National MS Society and the Canadian Institutes of Health Research. It has essentially been contributed to by: Donald Paty, Stanley Hashimoto, John Hooge, Lorne Kastrukoff, Joel Oger, Anthony Traboulee, Virginia Devonshire, Ana-Luiza Sayao. A full list of the consultant neurologists involved in the collection of data for the BCMS database can be found at <http://www.mstrust.org.uk/research/risksharingscheme/>

The authors are very grateful for access to the BCMS data.

The independent Scientific Advisory Group has been chaired by Prof Lilford and involved Prof Yoav Ben-shlomo, Prof Richard Gray and Prof Pelham Barton.

The MS Trust has performed an administrative coordinating role in the Risk-sharing Scheme and PAREXEL have performed the data collection from the sites and undertaken the analytical work.

The authors are grateful to Prof Neil Robertson and his team (Cardiff University) and Prof Kate Tilling, (Dept of Social Medicine, Bristol University) for the availability of the Welsh dataset and its preparation for our analysis.

1  
2  
3  
4  
5  
6  
7  
8  
9  
10  
11  
12  
13  
14  
15  
16  
17  
18  
19  
20  
21  
22  
23  
24  
25  
26  
27  
28  
29  
30  
31  
32  
33  
34  
35  
36  
37  
38  
39  
40  
41  
42  
43  
44  
45  
46  
47  
48  
49  
50  
51  
52  
53  
54  
55  
56  
57  
58  
59  
60

For peer review only

## References

1. National Institute for Clinical Excellence. Beta interferon and glatiramer acetate for the treatment of multiple sclerosis. NICE Technology Appraisal Guidance No. 32. London: NICE; 2002.
2. Department of Health. Cost effective provision of disease modifying therapies for people with multiple sclerosis. London: Health Service Circular 2002/004 London: Stationery Office; 2002.
3. Chilcott J, McCabe C, Tappenden P, O'Hagan A, Cooper NJ, Abrams K, et al. Modelling the cost-effectiveness of interferon beta and glatiramer acetate in the management of multiple sclerosis. *BMJ* 2003;326:522.
4. Hemmett L, Holmes J, Barnes M, Russell N. What drives quality of life in multiple sclerosis? *QJM*. 2004;97:671-6.
5. Kobelt G, Lindgren P, Parkin D, Francis DA, Johnson M, Bates D, et al. Costs and quality of life in multiple sclerosis. A cross-sectional observational study in the UK. *Scandinavian Working Papers in Economics*, 2000 (<http://swopec.hhs.se/hastef/papers/hastef0398.pdf> ; date accessed: 28-Aug-2013)
6. Boggild M, Palace J, Barton P, Ben-Shlomo Y, Bregenzer T, Dobson C, et al.. Multiple sclerosis risk sharing scheme: two year results of clinical cohort study with historical comparator. *BMJ* 2009;339:b4677.
7. The IFNB Multiple Sclerosis Study Group. Interferon beta-1b is effective in relapsing-remitting multiple sclerosis. I. Clinical results of a multicenter, randomized, double-blind, placebo-controlled trial. *Neurology*. 1993;43:655-61
8. Jacobs LD, Cookfair DL, Rudick RA, Herndon RM, Richert JR, Salazar AM, et al. Intramuscular interferon beta-1a for disease progression in relapsing multiple sclerosis. The Multiple Sclerosis Collaborative Research Group (MSCRG). *Ann Neurol*. 1996;39:285-94.
9. PRISMS (Prevention of Relapses and Disability by Interferon beta-1a Subcutaneously in Multiple Sclerosis) Study Group. Randomised double-blind placebo-controlled study of interferon beta-1a in relapsing/remitting multiple sclerosis. *Lancet*. 1998;352:1498-504.
10. Johnson KP, Brooks BR, Cohen JA, Ford CC, Goldstein J, Lisak RP, et al. Copolymer 1 reduces relapse rate and improves disability in relapsing-remitting multiple sclerosis: results of a phase III multicenter, double-blind placebo-controlled trial. The Copolymer 1 Multiple Sclerosis Study Group. *Neurology*. 1995;45:1268-76.
11. European Study Group on interferon beta-1b in secondary progressive MS. Placebo-controlled multicentre randomised trial of interferon beta-1b in treatment of secondary progressive multiple sclerosis. *Lancet*. 1998;352:1491-7.
12. Secondary Progressive Efficacy Clinical Trial of Recombinant Interferon-Beta-1a in MS (SPECTRIMS) Study Group. Randomized controlled trial of interferon-beta-1a in secondary progressive MS: Clinical results. *Neurology*. 2001;56:1496-504.
13. Tremlett H, Paty D, Devonshire V. Disability progression in MS is slower than previously reported. *Neurology* 2006;66:172-7.
14. Tremlett H, Zhao Y, Rieckmann P, Hutchinson M. New perspectives in the natural history of multiple sclerosis. *Neurology* 2010;74:2004-15.

15. Sadovnick AD, Ebers GC, Wilson RW, Paty DW. Life expectancy in patients attending multiple sclerosis clinics. *Neurology*. 1992;42:991-4.
16. Sweeney VP, Sadovnick AD, Brandeys V. Prevalence of multiple sclerosis in British Columbia. *Can J Neurol Sci*. 1986;13:47-51.
17. Poser CM, Paty DW, Scheinberg L, McDonald WI, Davis FA, Ebers GC, et al. New diagnostic criteria for multiple sclerosis: guidelines for research protocols. *Ann Neurol*. 1983;13:227-31.
18. Craig BA, Sendi PP. Estimation of the transition matrix of a discrete-time Markov chain. *Health Econ*. 2002;11:33-42.
19. Jackson CH, Sharples LS, Thompson SG, Duffy SW, Couto E. Multistate Markov models for disease progression with classification error. *Journal of the Royal Statistical Society: Series D (The Statistician)* 2003;52:193-209.
20. Roxburgh RH, Seaman SR, Masterman T, Hensiek AE, Sawcer SJ, Vukusic S, et al. Multiple Sclerosis Severity Score: using disability and disease duration to rate disease severity. *Neurology*. 2005;64:1144-51.
21. Albert P. A Markov model for sequences of ordinal data from a relapsing-remitting disease. *Biometrics* 1994;50:51-60.
22. Bell C, Graham J, Earnshaw S, Oleen-Burkey M, Castelli-Haley J, Johnson K., Cost-effectiveness of four immunomodulatory therapies for relapsing-remitting multiple sclerosis: a Markov model based on long-term clinical data. *J Manag Care Pharm* 2007;13:245-61.
23. Mandel M., Betensky R., Estimating time-to-event from longitudinal ordinal data using random-effects Markov models: application to multiple sclerosis progression. *Biostatistics* 2008;9:750-64.
24. Shirani A, Zhao Y, Kingwell E, Rieckmann P, Tremlett H. Temporal trends of disability progression in multiple sclerosis: findings from British Columbia, Canada (1975-2009). *Mult Scler*. 2012;18:442-50.
25. Shirani A, Zhao Y, Karim ME, Evans C, Kingwell E, van der Kop ML, et al. Association between use of interferon beta and progression of disability in patients with relapsing-remitting multiple sclerosis. *JAMA*. 2012;308:247-56.

**Table 1: Characteristics of patients reaching the Association of British Neurologists criteria in the British Columbia MS database after 1980 (the 'natural history' untreated comparator cohort) and the Risk-sharing Scheme cohort.**

| Baseline (eligible for DMT)                                                    | BCMS<br>(1980-1995*)    | RSS full cohort<br>RSS analysis cohort             |
|--------------------------------------------------------------------------------|-------------------------|----------------------------------------------------|
| <b>N</b>                                                                       | 898                     | 5610<br>4138                                       |
| <b>Females: n (%)</b>                                                          | 666 (74.2%)             | 4162 (74.2%)<br>3125 (75.5%)                       |
| <b>Age at baseline, years: mean (SD; range) [years]</b>                        | 37.2 (9.32; 18 - 69)    | 39.4 (9.05; 15 - 73)<br>38.4 (8.58; 18 - 73)       |
| <b>Age at onset of MS, years: mean (SD; range)</b>                             | 29.3 (8.65; 3 - 61)     | 30.5 (8.52; 5 - 68)<br>30.5 (8.38; 5 - 68)         |
| <b>Disease duration at baseline, years: mean (SD; range) [years]</b>           | 7.9 (6.89; 0.2 to 38.9) | 8.8 (7.47; 0 - 46)<br>7.7 (6.62; 0 - 41)           |
| <b>SPMS documented at baseline# n (%)</b>                                      | 141 (15.7%)             | 772 (13.8%)<br>-                                   |
| <b>Relapses in the last two-years prior to eligibility: median (quartiles)</b> | 2 (2 - 3)               | 3 (2 - 3)<br>3 (2 - 3)                             |
| <b>First eligible EDSS: median (quartiles; range)</b>                          | 2 (1, 3.5; 0-6.5)       | 3.5 (2.0, 5.0; 0 - 8.0)<br>3.0 (2.0, 4.0; 0 - 6.5) |

Key: 'Eligibility' refers to the first time a patient fulfilled the ABN criteria\*data was truncated to 1995 in the final models to minimize DMT exposure in the cohort

#all were still DMT eligible

RSS=Risk-sharing Scheme ; BCMS=British Columbia MS database; SD=standard deviation;

EDSS=Expanded disability status score ; DMT=disease modifying treatment

**Table 2: “Goodness of fit” statistics for the ten state\* disability (EDSS) Markov models**

| Description of each ten-state <sup>1</sup> disability model | Minus 2 log likelihood <sup>2</sup> x 1,000 | Prediction errors (years 1-10) <sup>3</sup> |      |         |
|-------------------------------------------------------------|---------------------------------------------|---------------------------------------------|------|---------|
|                                                             |                                             | Cells                                       | EDSS | Utility |
| No covariates                                               | 17.152                                      | 2.20                                        | 0.24 | 0.022   |
| One covariate models                                        |                                             |                                             |      |         |
| Age at onset, binary                                        | 17.458                                      | 1.39                                        | 0.09 | 0.009   |
| Age at onset, continuous                                    | 17.599                                      | 1.58                                        | 0.13 | 0.007   |
| MSSS at baseline, binary                                    | 17.460                                      | 1.41                                        | 0.10 | 0.008   |
| MSSS at baseline, continuous                                | 17.457                                      |                                             |      |         |
| Disease duration, binary                                    | 17.462                                      | 1.33                                        | 0.10 | 0.009   |
| Disease duration, continuous                                | 17.557                                      |                                             |      |         |
| Sex                                                         | 17.470                                      | 1.32                                        | 0.10 | 0.008   |
| Two covariates models                                       |                                             |                                             |      |         |
| Sex and age at onset, binary                                | 17.603                                      | 1.51                                        | 0.14 | 0.007   |
| Sex and age at onset, continuous                            | 17.618                                      |                                             |      |         |
| Age at onset and MSSS, binary                               | 17.609                                      | 1.53                                        | 0.14 | 0.007   |
| Age at onset and MSSS, continuous                           | 17.618                                      |                                             |      |         |
| Age at onset and disease duration, binary                   | 17.603                                      | 1.52                                        | 0.14 | 0.007   |
| Age at onset and disease duration, continuous               | 17.618                                      |                                             |      |         |

<sup>1</sup>the ten disability states refer to EDSS 0 to 9, i.e. EDSS 0 is “state 1”, EDSS 1 is “state 2” etc.

<sup>2</sup>log likelihood statistic as calculated by ‘msm’ module, see Jackson<sup>19</sup> for details; lower values implying a better model (to be compared within each class of models, e.g. one-covariate and two-covariate models)

EDSS= Expanded disability status score ; MSSS= Multiple sclerosis status score

<sup>3</sup>Prediction errors, averaged over years 1-10, for (a) the EDSS distribution in individual cells, (b) average EDSS, (c) average utility (see definitions in the appendix 3, comparing the values predicted by the model with the “observed” values using the method of midpoint interpolation (see appendix 2).



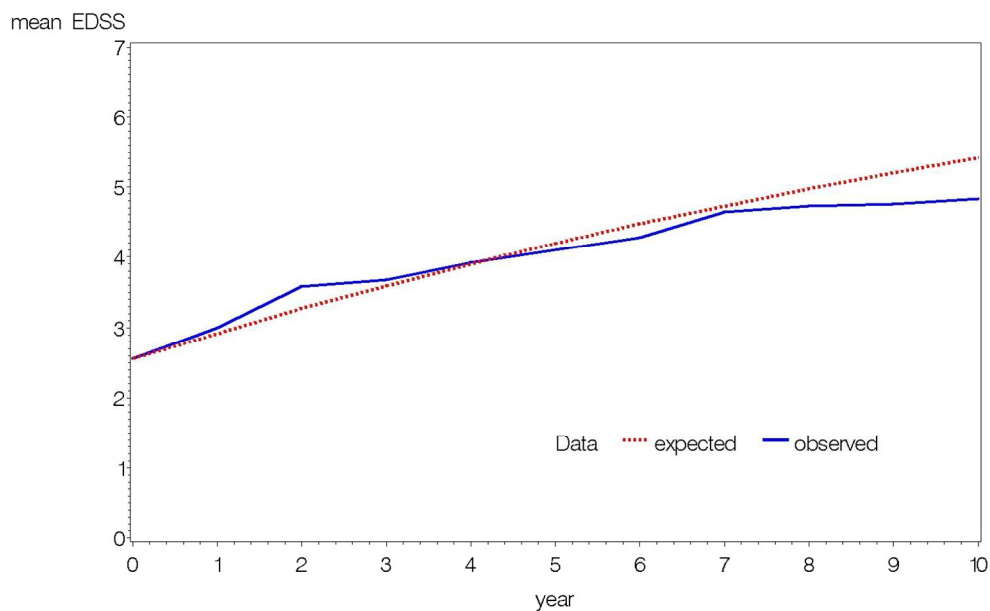

Transition probabilities obtained from the BCC dataset using the discrete Markov model were then applied to the baseline EDSS of the same cohort, projected over 10 years to produce a predicted mean EDSS outcome (red) and compared to the observed mean EDSS course of the cohort (blue).  
402x264mm (96 x 96 DPI)

View only

1  
2  
3  
4  
5  
6  
7  
8  
9  
10  
11  
12  
13  
14  
15  
16  
17  
18  
19  
20  
21  
22  
23  
24  
25  
26  
27  
28  
29  
30  
31  
32  
33  
34  
35  
36  
37  
38  
39  
40  
41  
42  
43  
44  
45  
46  
47  
48  
49  
50  
51  
52  
53  
54  
55  
56  
57  
58  
59  
60

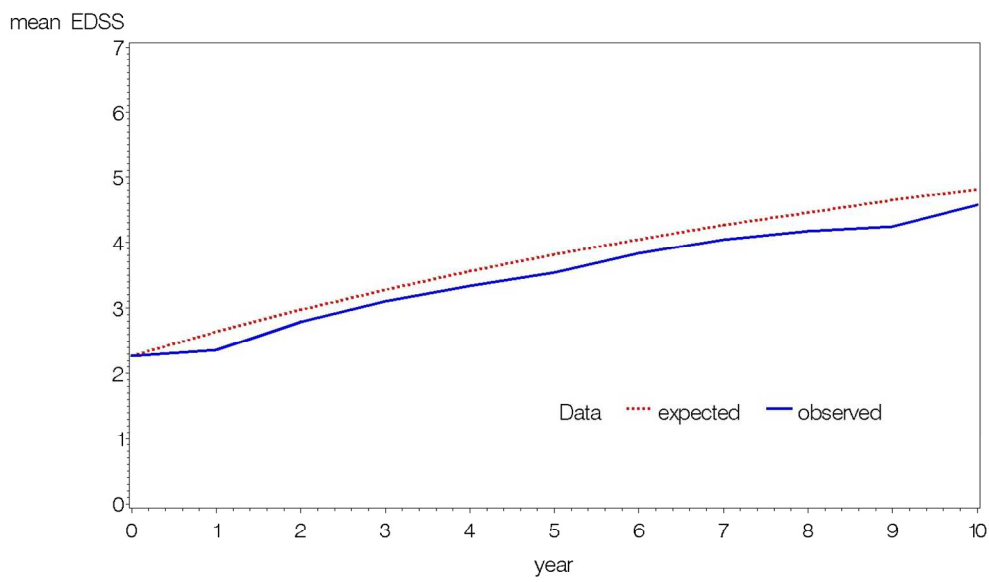

Figure 2: Transition probabilities obtained from the BCC dataset using the continuous Markov model were then applied to the baseline EDSS of the same cohort, projected over 10 years to produce a predicted mean EDSS outcome (red) and compared to the observed mean EDSS course of the cohort (blue).  
402x264mm (96 x 96 DPI)

View only

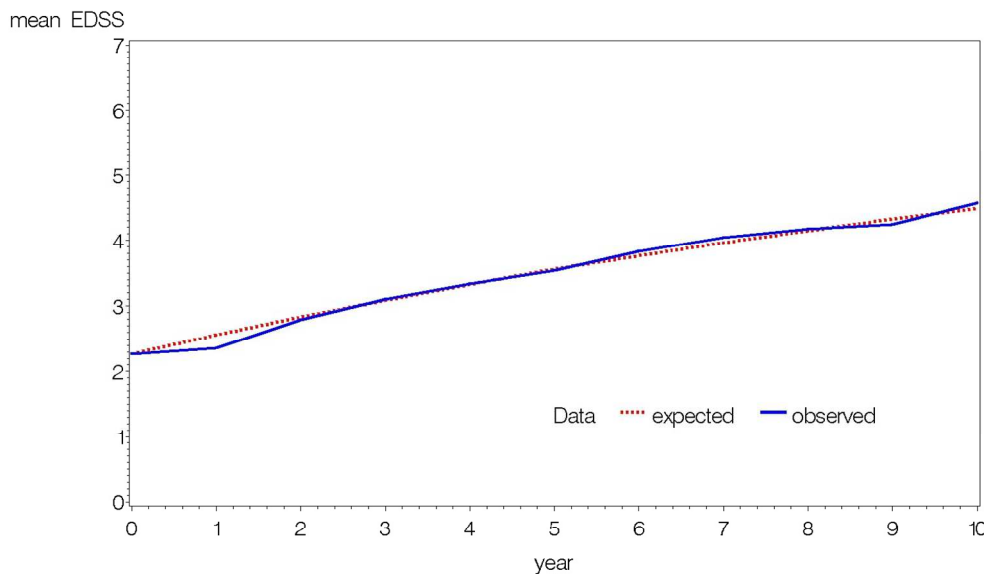

Figure 3: Transition probabilities obtained from the BCC dataset using the continuous Markov model with one covariate “age at onset” (binary version) were then applied to the baseline EDSS of the same cohort, projected over 10 years to produce a predicted outcome (red) compared to the observed course of the cohort (blue):

- a) Mean EDSS shown in the predicted and actual cohorts
- b) The proportion of patients predicted to be in each of the 10 EDSS states over time (state 1; EDSS 0, state 2; EDSS 1 and 1.5, state 3; EDSS 2.0 and 2.5, state 4; EDSS 3.0 and 3.5, state 5; EDSS 4.0 and 4.5, state 6; EDSS 5.0 and 5.5, state 7; EDSS 6.0 and 6.5, state 8; EDSS 7.0 and 7.5, state 9; EDSS 8.0 and 8.5, state 10; EDSS 9.0 and 9.5).

402x264mm (96 x 96 DPI)

only

1  
2  
3  
4  
5  
6  
7  
8  
9  
10  
11  
12  
13  
14  
15  
16  
17  
18  
19  
20  
21  
22  
23  
24  
25  
26  
27  
28  
29  
30  
31  
32  
33  
34  
35  
36  
37  
38  
39  
40  
41  
42  
43  
44  
45  
46  
47  
48  
49  
50  
51  
52  
53  
54  
55  
56  
57  
58  
59  
60

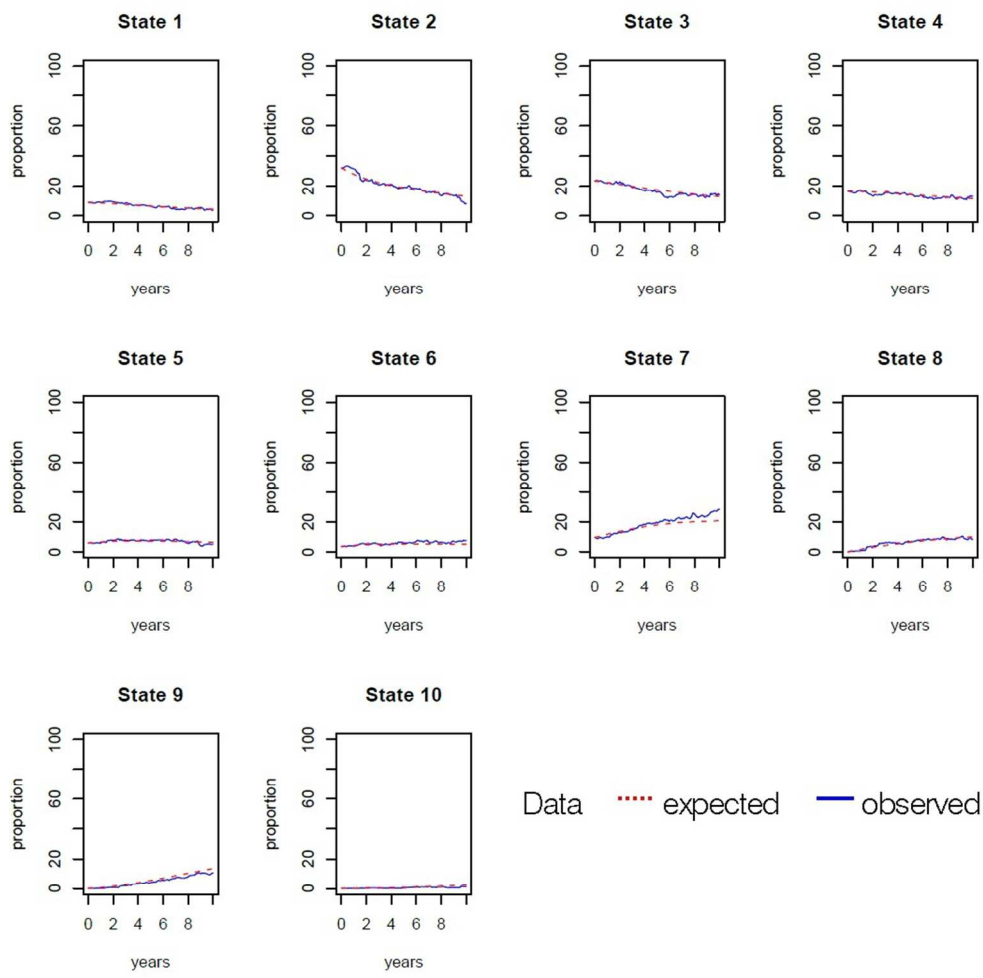

283x280mm (96 x 96 DPI)

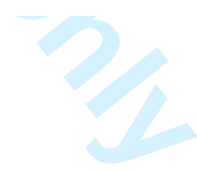

### Appendix 1 EDSS data extraction from the BCMS database

For the discrete Markov model and for tabular display of annual data the EDSS data were extracted and processed as follows. If the baseline EDSS fell when it was not the 'usual' yearly visit period, then subsequent EDSS scores could be lost. To maximize the number of EDSS transitions per patient, but keeping the yearly (+/- three calendar months) interval, EDSS scores were also 'individualized' as follows: the baseline EDSS became the baseline year, within that year, we searched to find the optimal new, individualized baseline for which the patient would, over the coming years have the most number of yearly EDSS scores. For some patients, this new individualized baseline date would not coincide with a clinic visit and would therefore not have an EDSS score present. When a baseline EDSS was required (e.g. for the discrete Markov model), data was also 'shifted' such that each patient would have a baseline EDSS. This lag between baseline ('eligibility') and EDSS was considered consistent with clinical practice in that it is not unusual to have a lag time between a patient becoming eligible for treatment and actual treatment initiation.

### Appendix 2 Algorithms to forecast EDSS distributions at any given time

The 'msm' algorithm allows the EDSS distribution to be forecasted at any time  $t$ .<sup>19</sup> To define what is the actual EDSS at a given time  $t$  (i.e. not necessarily when an observation was recorded) 'msm' offered two variants: (i) the last observation carried forward (LOCF) for each individual patient, and (ii) a 'midpoint interpolation' algorithm in which the EDSS state for a given patient at time  $t$  was taken as the score closest in time to the actually observed EDSS. Suppose an individual was observed in EDSS states  $S_{r-1}$  and  $S_r$  at two consecutive times  $t_{r-1}$  and  $t_r$ , and we wanted to estimate "observed" proportions at a time  $t$  between  $t_{r-1}$  and  $t_r$ . LOCF then meant that individuals were assumed to be in state  $S_{r-1}$  at time  $t$ , the same state as they were at  $t_{r-1}$ . Midpoint interpolation meant if  $t \leq (t_{r-1} + t_r) / 2$ , the midpoint of  $t_{r-1}$  and  $t_r$ , the state at  $t$  was assumed to be  $S_{r-1}$ , otherwise  $S_r$ . Option (i) would be more appropriate if EDSS values were always measured immediately after each transition. Option (ii) would be more appropriate if EDSS values were measured at mixed time intervals ('fixed or random'). Option (ii) was considered to mimic the clinical setting more closely and is also appears more applicable in progressive diseases.<sup>19</sup> Therefore all results presented in this paper were based on this 'midpoint interpolation' approach.

For the continuous Markov model we limited the range of transitions which can be regarded as 'instantaneous' to +/- 3, which meant that at any time  $t$  an instantaneous progression (or improvement) into another EDSS state was only possible when not exceeding three consecutive states (an instantaneous transition from 1 to 2, 3, or 4 was possible, for example, whereas 1 to 5 was not). This restriction was recommended to avoid computationally inefficient modelling of hazard rates which were virtually 0.

### Appendix 3 Validation of the models

The following validation techniques were applied when evaluating the different Markov models.

1  
2  
3 The most straightforward method for the discrete Markov model consisted of applying the transition  
4 matrix (and the 2nd, 3rd etc. power) to the vector of the baseline EDSS distribution in the BCMS  
5 reference database, calculating the forecasted EDSS distribution for t=1, 2, 3... years and comparing  
6 against the actual EDSS. A similar validation was performed in the continuous Markov model, as  
7 described by Jackson.<sup>1</sup>  
8  
9

10 As a second validation we divided the BCMS dataset randomly into two subsets of equal size, using  
11 one half to derive the model separately for the two subgroups, and then assessing the goodness of  
12 fit in the other half of the dataset. Although Jackson<sup>19</sup> emphasises that “Assessing the goodness of  
13 fit of this class of models [...] is worth further research” we decided to use a classical mean square  
14 prediction error (weighted root mean square over years of the prediction error in the average  
15 quantity shown, weighted by the number of patients contributing data in the given year) to compare  
16 competing models. Moreover, the computed likelihood itself as a result of the maximum likelihood  
17 algorithm was used to rank the different one and two covariate models.  
18  
19  
20  
21  
22  
23  
24  
25  
26  
27  
28  
29  
30  
31  
32  
33  
34  
35  
36  
37  
38  
39  
40  
41  
42  
43  
44  
45  
46  
47  
48  
49  
50  
51  
52  
53  
54  
55  
56  
57  
58  
59  
60

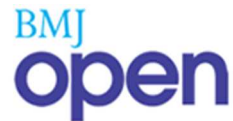

**UK Multiple Sclerosis Risk-sharing Scheme: a new natural history dataset and an improved Markov model**

|                                 |                                                                                                                                                                                                                                                                                                                                                                                                                                                                                                                                      |
|---------------------------------|--------------------------------------------------------------------------------------------------------------------------------------------------------------------------------------------------------------------------------------------------------------------------------------------------------------------------------------------------------------------------------------------------------------------------------------------------------------------------------------------------------------------------------------|
| Journal:                        | <i>BMJ Open</i>                                                                                                                                                                                                                                                                                                                                                                                                                                                                                                                      |
| Manuscript ID:                  | bmjopen-2013-004073.R1                                                                                                                                                                                                                                                                                                                                                                                                                                                                                                               |
| Article Type:                   | Research                                                                                                                                                                                                                                                                                                                                                                                                                                                                                                                             |
| Date Submitted by the Author:   | 10-Dec-2013                                                                                                                                                                                                                                                                                                                                                                                                                                                                                                                          |
| Complete List of Authors:       | Palace, Jacqueline; John Radcliffe Hospital, Clinical Neurology<br>Bregenzer, Thomas; PAREXEL International, Biostatistics Unit<br>Tremlett, Helen; University Of British Columbia, Medicine (Neurology)<br>Oger, Joel; University Of British Columbia, Division of Neurology<br>Zhu, Feng; University Of British Columbia, Medicine (Neurology)<br>Boggild, Mike; The Townsville Hospital, Neurology Department<br>Duddy, Martin; The Newcastle upon Tyne Hospitals, Neurology Department<br>Dobson, Charles; Department of Health, |
| <b>Primary Subject Heading</b>: | Neurology                                                                                                                                                                                                                                                                                                                                                                                                                                                                                                                            |
| Secondary Subject Heading:      | Health economics, Pharmacology and therapeutics, Research methods                                                                                                                                                                                                                                                                                                                                                                                                                                                                    |
| Keywords:                       | Multiple sclerosis < NEUROLOGY, quality of life, risk sharing scheme, interferon-beta, glatiramer acetate, Markov model                                                                                                                                                                                                                                                                                                                                                                                                              |
|                                 |                                                                                                                                                                                                                                                                                                                                                                                                                                                                                                                                      |

SCHOLARONE™  
Manuscripts

**UK Multiple Sclerosis Risk-sharing Scheme: a new natural history dataset and an improved****Markov model**

Palace, Jacqueline, Bregenzer, Thomas, Tremlett, Helen, Oge, Joel, Zhu, Feng, Boggild, Mike,  
Duddy, Martin and Dobson, Charles

**Palace, Jacqueline**

John Radcliffe Hospital - Clinical Neurology  
Headington, Oxford OX39DU  
United Kingdom

**Bregenzer, Thomas**

PAREXEL International - Biostatistics Unit  
Berlin  
German

**Tremlett, Helen**

University Of British Columbia - Medicine (Neurology)  
Vancouver, British Columbia  
Canada

**Oge, Joel**

University Of British Columbia - Division of Neurology  
Vancouver, British Columbia  
Canada

Zhu, Feng University Of British Columbia - Medicine (Neurology)  
Vancouver, British Columbia  
Canada

**Boggild, Mike**

The Townsville Hospital - Neurology Department  
Townsville, Queensland  
Australia

**Duddy, Martin**

The Newcastle upon Tyne Hospitals - Neurology Department  
Newcastle  
United Kingdom

**Dobson, Charles**

Department of Health  
Leeds  
United Kingdom



1  
2  
3 The lead author\* affirms that this manuscript is an honest, accurate, and transparent account of the  
4 study being reported; that no important aspects of the study have been omitted; and that any  
5 discrepancies from the study as planned (and, if relevant, registered) have been explained.  
6  
7  
8  
9  
10  
11  
12  
13  
14  
15  
16  
17  
18  
19  
20  
21  
22  
23  
24  
25  
26  
27  
28  
29  
30  
31  
32  
33  
34  
35  
36  
37  
38  
39  
40  
41  
42  
43  
44  
45  
46  
47  
48  
49  
50  
51  
52  
53  
54  
55  
56  
57  
58  
59  
60

For peer review only

## **Abstract**

**Objectives:** In 2002, the UK's National Institute for Health and Care Excellence concluded that the multiple sclerosis (MS) disease modifying therapies; interferon- $\beta$  and glatiramer acetate, were not cost-effective over the short term but recognised that reducing disability over the longer-term might dramatically improve the cost-effectiveness. The UK Risk-sharing Scheme (RSS) was established to ensure cost-effective provision by prospectively collecting disability-related data from UK treated MS patients and comparing findings to a natural history (untreated) cohort. However, deficiencies were found in the originally selected untreated cohort and the resulting analytical approach. This study aims to identify a more suitable natural history comparator cohort and to develop a robust analytical approach using the new cohort

**Design:** The Scientific Advisory Group review, recommended the British Columbia Multiple Sclerosis (BCMS) database, Canada, as providing a more suitable natural history comparator cohort. Transition probabilities were derived and different Markov models (discrete and continuous) with and without baseline covariates were applied.

**Setting:** MS clinics and analysis groups in Canada and the UK.

**Participants:** From the BCMS database, 898 'untreated' MS patients considered eligible for drug treatment based on the UK's Association of British Neurologists criteria.

**Outcome measure:** The predicted disability, as measured by the Expanded Disability Status Scale (EDSS) score was collected and assessed for goodness of fit when compared to actual outcome.

**Results:** The BCMS untreated cohort contributed 7335 EDSS scores over a median 6.4 years (6357 "transitions" where EDSS values were recorded at consecutive visits) during the study period (1980-1995). A continuous Markov model with "age at onset" as a binary covariate was deemed the most suitable model for future RSS analysis.

**Conclusion:** A new untreated MS cohort from British Columbia, Canada has been selected and will be modelled using a continuous Markov model with age as a baseline covariate. This approach will now be applied to the treated UK RSS MS cohort for future price adjustment calculations.

### Strengths and limitations of this study

#### Strengths of this study:

- Identification of a new natural history cohort for the UKRSS, consisting of untreated MS patients in an era when disease-modifying drugs for MS were not available, minimizing potential selection bias
- Identification and validation of a Markov model for disease progression in MS which can be applied to data collected in clinical practice over multiple years of follow up.
- The identification of an analytical model which can use data collected at any time point within the follow up period.

#### Limitations of this study:

- The study related to observational data collected in clinical practice; unseen or unmeasured confounding cannot be adjusted for.
- Different techniques to assess effectiveness of drugs in observational studies such as matching on propensity scores cannot be directly compared to this methodology.

## Introduction

In January 2002, the UK's National Institute of Health and Care Excellence (NICE) opted not to recommend the use of the disease modifying therapies (DMTs) interferon- $\beta$  and glatiramer acetate for multiple sclerosis (MS) on the basis of cost-effectiveness analyses using data derived from the pivotal 2-3 year randomised controlled trials.<sup>1</sup> However, they recognised that uncertainties over the assumptions made in the modelling could unpredictably influence the long-term estimates of cost effectiveness. Thus in February 2002 the UK's Department of Health launched the 'Risk-sharing Scheme' (RSS)<sup>2</sup> with a circular entitled the "Cost effective provision of disease modifying therapies for people with multiple sclerosis" in collaboration with the Association of British Neurologists (ABN), the MS Trust, the MS Society and the pharmaceutical companies manufacturing interferon- $\beta$  and glatiramer acetate. Between 2002 and 2005 the scheme enrolled over 5,000 MS patients initiating a DMT in the UK, with the aim of measuring their disability annually over a ten year period.

The principle In the RSS is to use a Markov model to predict, for each DMT separately, the expected movement of patients between the EDSS states both "on" and "off" treatment. For patients "off" treatment, the model uses a matrix of transition probabilities derived from the actual progressions seen in the 'natural history' comparator cohort. These transition matrices are modified for patients "on" treatment by multiplying by the hazard ratio (relative rate of disease progression) derived separately for each DMT from the pivotal randomized controlled clinical trials. The model then predicts how the distribution of patients will evolve over a 20-year horizon, starting with the actual distribution at baseline for the primary analysis RSS cohort. Comparing the average observed loss of utility (average utility-weighted disease progression) for patients in the RSS to the expected loss calculated by the Markov model for patients "on" treatment; it is calculated as follows. The *expected* 'benefit' of treatment (with a specific DMT) is the "hypothetical" difference between the expected outcome without treatment and with treatment, as calculated in each case from the Markov model. The *actual* 'benefit' of treatment is the "observed" difference between the expected outcome without treatment and the actual outcome with treatment. The 'deviation' of the actual benefit from the expected is the primary outcome measure and calculated as a percentage of the expected benefit. This measure can have negative or positive values so that a negative deviation implies that the observed benefit was greater than predicted, a positive deviation suggesting that it was worse than

1  
2  
3 predicted and a value of 0 indicating that it was exactly as predicted. A positive deviation beyond the  
4 level agreed (confidential and individual between each pharmaceutical company and the Department  
5 of Health) would lead to a price adjustment down to achieve the target cost effectiveness. Details can  
6 be found in the Health Service Circular<sup>2</sup>.  
7  
8  
9

10  
11 The original cost effectiveness model<sup>3</sup> produced a target outcome based upon transition probabilities  
12 obtained from a pre-existing natural history (DMT naive) cohort of patients from London, Ontario,  
13 Canada along with hazard ratios from the pivotal randomised control trials (unpublished data provided  
14 to the Department of Health by the manufacturers). Complementary quality of life data collected by  
15 the MS Trust<sup>4</sup> and cost data from Kobelt et al<sup>5</sup> were used to populate the cost-effectiveness model.  
16  
17 The targets ensured that the UK's National Health Service benchmark of £36,000 (46,000 Euro /  
18 56,000 US dollars) per quality adjusted life year (QALY) was reached over a 20 year projection,  
19 based on a planned 10 year follow up period within the RSS with 2 yearly interim analyses. Before  
20 being allowed to enter the scheme, the costs of each drug was assessed against the NICE bench  
21 mark over a 20 year time horizon. Price reductions were implemented to ensure each product  
22 reached the target cost per QALY using the original NICE calculations<sup>3</sup>, an average 13.7% price  
23 reduction was achieved for the NHS at the outset of the Scheme.  
24  
25  
26  
27  
28  
29  
30  
31  
32  
33

34 The two year analysis revealed significant inconsistencies in a number of sensitivity analyses.<sup>6</sup>  
35 Depending on the underlying assumptions, some analyses suggested that observed disability  
36 progression in the treated cohort was worse than that predicted from the historical untreated cohort  
37 while others demonstrated the contrary effect. A detrimental effect of DMT did not match the  
38 described effect on short term, 2-3 year, disability seen in the randomised placebo controlled trials.<sup>7-12</sup>  
39  
40 With the predetermined analytical approach (based on a discrete Markov model) appearing to  
41 produce unreliable results with wide variation, a decision was made to postpone any decision on cost  
42 effectiveness to allow for a reappraisal of the process and to reconsider whether the statistical models  
43 and control data chosen were "fit for purpose."  
44  
45  
46  
47  
48  
49  
50

51 In retrospect, both the control data set and analysis model selected, when setting up the RSS, were  
52 found to have intrinsic flaws that made them unsuitable for the task.<sup>6</sup> The natural history cohort (from  
53 London, Ontario, Canada) was unexpectedly found to contain retrospectively smoothed disability data  
54 (rather than actual, real-time collected disability scores), censoring any improvement in EDSS.  
55  
56  
57  
58  
59  
60

1  
2  
3 Comparing our uncensored treated cohort to data retrospectively smoothed in this way would have  
4 the effect of unpredictably underestimating any treatment effect. In addition, individual-level patient  
5 data were not available from the London, Ontario cohort, which prevented precise baseline matching  
6 between the two cohorts, limiting our validation of the underlying (Markov) model for disease  
7 progression. Furthermore, there were only 342 patients matching the ABN prescribing criteria from  
8 which to generate the models.  
9

10  
11  
12 This paper outlines the development of a more appropriate analysis plan and the choice of a cohort fit  
13 for the needs of the scheme. The method described will be applied in the 4 and 6 year cost-  
14 effectiveness analyses. The analysis plan was approved by the scheme's independent Scientific  
15 Advisory Group in December 2012 in advance of unlocking the newly collected 4 and 6 year UK Risk-  
16 sharing Scheme data planned for autumn 2013.  
17  
18  
19

## 20 **Methods**

### 21 Identification of a new multiple sclerosis natural history dataset

22  
23  
24 The Scientific Advisory Group undertook a detailed examination of all the available dataset through  
25 literature reviews, expert opinion, discussion with the clinical leads for the RSS and discussion with  
26 the Sylvia Lawry Centre for Multiple Sclerosis Research, Germany (<http://www.slcmr.net>). Selection  
27 criteria included availability of Expanded Disability Status Scale (EDSS) score measurements and  
28 access to the unprocessed (actual) scores (i.e. no data smoothing or other data manipulation). Other  
29 factors considered were size of the database, prospective data collection and length of follow-up, and  
30 the broader setting such as a close match to the UK in terms of the health system and MS prevalence  
31 in the underlying population. Whilst no single perfect dataset existed the British Columbia Multiple  
32 Sclerosis (BCMS) database, Canada (est. 1980) was identified as the best natural history comparator  
33 cohort for our purposes.<sup>13,14</sup> In this dataset – as in the RSS – actual EDSS scores were recorded  
34 prospectively. It is estimated to capture 80% of the BC MS population<sup>15,16</sup> and as such is considered  
35 representative of the wider MS population. EDSS scores were recorded by MS specialist neurologists  
36 after a face-to-face consultation with the patient; this typically occurred at the annual MS clinic visit.  
37 Patient data was not truncated if secondary-progressive MS was reached; i.e. all relapse-onset MS  
38 patients and their respective EDSS scores were considered eligible. By 2004, the database had  
39  
40  
41  
42  
43  
44  
45  
46  
47  
48  
49  
50  
51  
52  
53  
54  
55  
56  
57  
58  
59  
60

1  
2  
3 records for over 5900 patients spanning 28 years (>25,000 cumulative years) of prospective follow-  
4  
5 up. Until 1996 DMTs were not widely available in British Columbia.  
6  
7

8  
9 Patient and data selection from the BCMS database.

10  
11 In order to generate relevant data for our needs, patients were only selected from the BCMS  
12  
13 database if they fulfilled the 2001 Association of British Neurologists (ABN) criteria for interferon- $\beta$  and  
14  
15 glatiramer acetate (IFN-  $\beta$ /GA) use (adapted from Appendix IV Health Service Circular 2002/004),  
16  
17 defined as: EDSS $\leq$ 6.5;  $\geq$ 18 years old; two relapses in the last 2 calendar years.  
18

19  
20 Baseline for each patient was the 'first eligibility date,' meaning the first date at which a patient fulfilled  
21  
22 the ABN eligibility criteria. Only patients with definite MS (Poser criteria<sup>17</sup>) and a minimum of two  
23  
24 EDSS scores at least 9 months apart were considered.

25  
26 In order to be comparable with the RSS data the following adjustments and selection were applied:  
27

28  
29 1) EDSS scores taken during a relapse or when disability was affected by other factors considered  
30  
31 largely unrelated to MS (e.g. hip fracture) were excluded.  
32

33  
34 2) For the original discrete Markov model (see below) as well as visual presentation of the yearly  
35  
36 descriptive data (see under results), annual EDSS scores were needed. However, as is typical in  
37  
38 clinical practice, not all visits / EDSS assessments occurred at exactly yearly intervals and the  
39  
40 exclusion of some EDSS scores (e.g. due to a relapse or hip fracture) also affected the availability of  
41  
42 a yearly score. Therefore, data was selected such that only EDSS scores one year apart (+/- three  
43  
44 calendar months) were considered. See appendix 1 for further details.  
45

46  
47 3) For the continuous Markov model, (see below) all eligible EDSS scores were used regardless of  
48  
49 their measurement interval i.e. no yearly data selection, as in (2), was needed.  
50

51  
52 4) All patient data was truncated to the end of 1995 (i.e. the last full year in which the DMTs were not  
53  
54 widely available in BC Although initially it was planned to truncate individual patient profiles only once  
55  
56 a DMT was initiated (in order to maximise the number of EDSS assessments), even when this  
57  
58 extended past 1995 when treatment would have been available). It became apparent that this  
59  
60

1  
2  
3 introduced a bias into the data, likely related to 'indication bias,' whereby patients 'doing well' would  
4 be less likely to start a DMT.  
5  
6

### 7 Analysis

8  
9  
10 The primary purpose of the analytical work was to find the best statistical model able to predict EDSS  
11 progression in a natural history cohort based on entry demographic and clinical data. The following  
12 models were applied in the current study and their performances were critically evaluated.  
13  
14

15  
16 a) The discrete Markov model<sup>18</sup> as in the original 2 year analysis<sup>6</sup> i.e. disability scores (EDSS) had to  
17 be measured at discrete, fixed time points.  
18  
19

20  
21 b) A continuous Markov model allowing for EDSS scores to be collected at any time, i.e. at any  
22 unevenly spaced time intervals, as is typical in clinical practice.<sup>19</sup> Such a model also allowed  
23 covariates to be included. This model allows for more complete use of EDSS scores collected at  
24 irregular time intervals both in the BCMS and RSS cohorts.  
25  
26  
27

28  
29 With regard to the "MS course" (i.e. relapsing remitting vs. secondary progressive) as a potential  
30 covariate, we did not distinguish between these disease states when developing the Markov models  
31 because secondary progressive MS is simply a later stage of the relapsing remitting form of the  
32 disease and the transition has considerable overlap.  
33  
34  
35  
36  
37  
38  
39

### 40 Predicting outcomes in the continuous Markov model (b)

41  
42 A multi-state model algorithm ('R' library 'msm'<sup>19</sup>) allows the EDSS distribution to be predicted at any  
43 time  $t$ . See appendix 2 for further details).  
44  
45

46  
47 To keep computations feasible, only integer EDSS values were used and fractional values rounded  
48 down (i.e. EDSS 1.5 was scored as 1, 2.5 was scored as 2 etc.). Moreover, 'msm' as a tool for *multi-*  
49 *state modelling* requires a consecutive numbering of (disease) states, starting with "1". Therefore the  
50 (rounded down) EDSS 0 became 'state 1', EDSS 1 'state 2' etc., leading to the ten EDSS 'states' (1–  
51 10) representing EDSS 0–9. Transition probability and intensity matrices as the output of these  
52 models were then used to predict disease progression in terms of EDSS as follows.  
53  
54  
55  
56  
57  
58  
59  
60



### *Covariates considered in the models*

The selection of potential covariates by the scientific advisory group was based upon; (a) those which were reliably and consistently recorded in both the BCMS and the RSS database and (b) *a priori* knowledge of those associated with the outcome of disability progression. As a result, sex, age at MS symptom onset, as well as disease duration and disability (EDSS) – combined into a Multiple Sclerosis Severity Score (MSSS)<sup>20</sup> were tested in the continuous Markov model with up to two covariates. In addition, for the more promising models an alternative model was considered with dichotomous covariates (split at the median) replacing the continuous variables. This has the advantage that the resulting model can be formulated as the aggregate of a small number of discrete Markov models, so computations can be carried out without requiring special software, especially since the EDSS values in the RSS have been collected at strict yearly intervals, as opposed to the BCMS data which was based on routine clinical practice, and therefore do not necessitate a continuous model.

Critical evaluation of the models was performed using the following validation techniques, with the goal being to identify the most appropriate model to represent the natural progression of MS. See appendix 3 for further details.

- 1) Transition probabilities derived from the complete eligible, BCMS natural history data were applied to the baseline data to predict outcomes over the subsequent 10 years to assess how well it matched the observed data from which the model was derived.
- 2) The BCMS dataset was repeatedly randomly divided into two subsets of equal size, with one half only being used to derive transition probabilities (as in #1). The probabilities derived from this half were then applied to the baseline characteristics of the second half, generating a model whose goodness of fit could be judged against the actual, observed 10 year disability data of this second half.

### Measuring Goodness of Fit

1  
2  
3 Goodness of fit was assessed via visual inspection of the graphical displays as well as numerically.  
4 These included progression over time (mean EDSS profiles) for the cohort as a whole as well as  
5 comparisons with the proportions in a particular EDSS state over time.  
6  
7

8  
9 For the numerical assessment a classical mean square prediction error (weighted root mean square  
10 over years of the prediction error in the average quantity shown, weighted by the number of patients  
11 contributing data in the given year) and the likelihood, resulting from the maximum likelihood  
12 algorithm were calculated for each of the covariate models to allow comparison.  
13  
14

15  
16  
17 This study was approved by the University of British Columbia's Clinical Research Ethics Board (H08-  
18 01544)  
19

## 20 21 22 **Results**

### 23 24 Data Description

25  
26  
27 The baseline demographics showed the BCMS and RSS cohorts to be remarkably well matched.  
28 Patient characteristics are shown in table 1.  
29

30  
31  
32 The natural history BCMS comparator dataset comprised of 898 patient profiles with 7335 EDSS  
33 scores providing 6357 transitions between consecutive EDSS states, i.e 6357 'events' where EDSS  
34 values were recorded at consecutive visits. In any given "transition," a patient's EDSS could increase,  
35 decrease or stay the same  
36  
37

### 38 39 40 Discrete Markov model

41  
42  
43 When applying the discrete Markov model to the BCMS reference data, the goodness of fit was  
44 unsatisfactory, underestimating EDSS in earlier years and overestimating in later years (see figure 1).  
45 Consequently, the discrete Markov model was no longer considered appropriate, and development of  
46 a continuous Markov model was pursued.  
47  
48

### 49 50 51 Continuous Markov models

52  
53  
54 The following continuous 10 state Markov models (EDSS 0 to 9), with and without covariates, were  
55 evaluated:  
56

- 57  
58 1. Model without covariates  
59  
60

- 1
- 2
- 3 2. One covariate model with age at onset\*
- 4 3. One covariate model with MSSS\* at baseline
- 5
- 6 4. One covariate model with disease duration\* at baseline
- 7
- 8 5. One covariate model with sex
- 9
- 10 6. Two covariate model: sex and age at onset\*
- 11 7. Two covariate model: MSSS\* at baseline and age at onset\*
- 12 8. Two covariate model: disease duration\* at baseline and age at onset\*
- 13 - \*two variants were implemented: continuous (original) data and a 'binary' version with the
- 14 median used for categorisation.
- 15
- 16

17 There was a systematic deviation with a slight overestimation when the continuous Markov model  
18 without covariates was applied (figure 2). Hence this model was not considered further.

19  
20  
21 After validation was repeated for all covariate models (table 2), it was noted that inclusion of a second  
22 covariate did not reveal any additional benefits. With one covariate, the model with "age at onset" as a  
23 binary covariate (median: 28 years) was selected because it displayed the smallest -2 log likelihood  
24 and minimal EDSS prediction error, see table 2. Further, the goodness of fit was acceptable when  
25 comparing the predicted and observed EDSS profiles, as shown in Figure 3a. A more detailed  
26 comparison of observed and expected proportions 'per EDSS state' is shown in Figure 3b which  
27 confirmed that no systematic deviations were present which might otherwise have been cancelled out  
28 when only looking at an average EDSS profile. It was concluded that only random fluctuation  
29 remained, and a systematic deviation was no longer visible. When comparing figure 1 with figures 2  
30 or 3 it should be noted that the former is based on the *annual* EDSS data which were obtained as  
31 described in Appendix 1 while figures 2 and 3 show the EDSS at any time  $t$ , i.e. not necessarily when  
32 an observation was recorded (while the continuous Markov model takes into account all observations  
33 at any time  $t$  it is not straightforward to define what the 'observed EDSS' at any time  $t$  is in a graphic  
34 representation; for details on how to define and calculate what is the observed EDSS at a given time  
35 see Appendix 2).

36  
37  
38 Using this 'best' model, transition probabilities were extracted from half of the BCMS cohort and  
39 applied to the other half. This gave good predictions, with the mean EDSS profiles (observed versus  
40 predicted) being similar to each other and to those of the entire cohort.  
41  
42  
43  
44  
45  
46  
47  
48  
49  
50  
51  
52  
53  
54  
55  
56  
57  
58  
59  
60

1  
2  
3 In summary, the continuous Markov model with a single covariate - onset age - was considered the  
4 model of choice to be used in future RSS analysis. The respective transition matrices are presented in  
5  
6 Table 3.  
7

### 8 9 **Discussion**

10 This paper outlines the successful identification of a more suitable natural history cohort for the UK  
11 MS risk-sharing scheme, with the British Columbia, Canada dataset now replacing the London,  
12 Ontario, Canada cohort in the RSS analysis plan. The analytical work is based on a Markov model  
13 which has been frequently used for ordinal data from relapsing (remitting) diseases, especially  
14  
15 MS.<sup>21,22,23</sup>  
16  
17

18  
19  
20  
21  
22 Further, because use of the British Columbian data has now allowed access to a richer dataset,  
23 including full access to original, 'real-time' disability (EDSS) assessments, as well as individual  
24 patient-level, we have been able to explore and develop more appropriate approaches. Specifically,  
25 we were able to employ more advanced statistical models, making use of all the available data and  
26 including clinically relevant patient-level characteristics as covariates in order to identify the most  
27 accurate predictive model to be applied to the RSS. Finally, we observed that to minimize 'indication  
28 bias' in relation to initiation of a DMT in the natural history cohort (British Columbia), censoring (data  
29 truncation) was more appropriate at the population (rather than individual) level.  
30  
31

32  
33  
34  
35  
36  
37 Findings from our validation procedures indicate future feasibility with respect to obtaining reliable  
38 cost-effectiveness results in the upcoming 6 year RSS analyses. For instance, visualisation of the  
39 predicted and observed outcomes in the final model showed almost perfect overlap, with a one-  
40 covariate model, with no additional improvements from introducing further covariates. In addition, the  
41 final model was able to predict accurately the MS disease course (disability) in half of the cohort  
42 (randomly selected) having obtained the transition probabilities from the other half. These  
43 observations along with the baseline comparability of the BCMS and the RSS cohorts suggest the  
44 transition probabilities from the BCMS cohort within this model can be used to predict the untreated  
45 progression of patients in the RSS.  
46  
47

48  
49  
50  
51  
52  
53  
54  
55 An additional strength of this continuous model is the ability to include all valid disability (EDSS)  
56 assessments, regardless of their exact timing, maximising data usage. We acknowledge the potential  
57  
58  
59  
60

1  
2  
3 limitations of using of a historical control from a geographically discrete population. It is possible that  
4 the natural history of MS has changed over time or that the BCMS population is not representative of  
5 a UK one. However, in British Columbia, it has been previously shown that disability progression (as  
6 measured by the EDSS) has not substantially changed overtime (1980-2009<sup>24</sup>). Further, we have  
7 previously shown that the use of a 'contemporary' untreated control cohort – i.e. where patients are  
8 potentially eligible for a DMT in an era when the DMTs are readily available, but remain untreated - is  
9 subject to indication bias and thus a historical control cohort, with data collected pre-DMT use, is likely  
10 to be more appropriate.<sup>25</sup> Although we are proposing using a dataset from Canada (as was the  
11 original RSS natural history dataset) and cannot rule out differences between the BCMS patients and  
12 the UK RSS cohort, we are reassured that the baseline features are comparable except baseline  
13 EDSS, but in the underlying Markov model we calculate the transition probabilities between EDSS  
14 'states', and different baseline EDSS distributions would only matter if baseline EDSS as such had a  
15 prognostic value, which doesn't seem to be the case when we were looking at the rates of EDSS  
16 progression stratified by EDSS at baseline. In addition, the underlying ethnicity of the two jurisdictions  
17 was similar; around the time of the cohort selection in British Columbia, 30.2% of the population self-  
18 identified as British and within the wider BCMS database, >90% were Caucasian,<sup>26,27</sup> which is  
19 comparable to the UK cohort. Both cohorts may have enrolled a small number of patients with  
20 neuromyelitis optica (we estimate this to be less than 0.5% of the total<sup>28</sup>) because the availability of  
21 the antibody assay occurred after 2007 (and after enrolment to the RSS scheme). An additional  
22 limitation is the potential for different ways of measuring the EDSS scores between the BCMS and the  
23 UK RSS cohorts because of changes in how the EDSS is interpreted over time and also because of  
24 differences in the physicians performing the assessments.

25  
26  
27  
28  
29  
30  
31  
32  
33  
34  
35  
36  
37  
38  
39  
40  
41  
42  
43  
44  
45  
46  
47  
48  
49  
50  
51  
52  
53  
54  
55  
56  
57  
58  
59  
60  
61  
62  
63  
64  
65  
66  
67  
68  
69  
70  
71  
72  
73  
74  
75  
76  
77  
78  
79  
80  
81  
82  
83  
84  
85  
86  
87  
88  
89  
90  
91  
92  
93  
94  
95  
96  
97  
98  
99  
100  
101  
102  
103  
104  
105  
106  
107  
108  
109  
110  
111  
112  
113  
114  
115  
116  
117  
118  
119  
120  
121  
122  
123  
124  
125  
126  
127  
128  
129  
130  
131  
132  
133  
134  
135  
136  
137  
138  
139  
140  
141  
142  
143  
144  
145  
146  
147  
148  
149  
150  
151  
152  
153  
154  
155  
156  
157  
158  
159  
160  
161  
162  
163  
164  
165  
166  
167  
168  
169  
170  
171  
172  
173  
174  
175  
176  
177  
178  
179  
180  
181  
182  
183  
184  
185  
186  
187  
188  
189  
190  
191  
192  
193  
194  
195  
196  
197  
198  
199  
200  
201  
202  
203  
204  
205  
206  
207  
208  
209  
210  
211  
212  
213  
214  
215  
216  
217  
218  
219  
220  
221  
222  
223  
224  
225  
226  
227  
228  
229  
230  
231  
232  
233  
234  
235  
236  
237  
238  
239  
240  
241  
242  
243  
244  
245  
246  
247  
248  
249  
250  
251  
252  
253  
254  
255  
256  
257  
258  
259  
260  
261  
262  
263  
264  
265  
266  
267  
268  
269  
270  
271  
272  
273  
274  
275  
276  
277  
278  
279  
280  
281  
282  
283  
284  
285  
286  
287  
288  
289  
290  
291  
292  
293  
294  
295  
296  
297  
298  
299  
300  
301  
302  
303  
304  
305  
306  
307  
308  
309  
310  
311  
312  
313  
314  
315  
316  
317  
318  
319  
320  
321  
322  
323  
324  
325  
326  
327  
328  
329  
330  
331  
332  
333  
334  
335  
336  
337  
338  
339  
340  
341  
342  
343  
344  
345  
346  
347  
348  
349  
350  
351  
352  
353  
354  
355  
356  
357  
358  
359  
360  
361  
362  
363  
364  
365  
366  
367  
368  
369  
370  
371  
372  
373  
374  
375  
376  
377  
378  
379  
380  
381  
382  
383  
384  
385  
386  
387  
388  
389  
390  
391  
392  
393  
394  
395  
396  
397  
398  
399  
400  
401  
402  
403  
404  
405  
406  
407  
408  
409  
410  
411  
412  
413  
414  
415  
416  
417  
418  
419  
420  
421  
422  
423  
424  
425  
426  
427  
428  
429  
430  
431  
432  
433  
434  
435  
436  
437  
438  
439  
440  
441  
442  
443  
444  
445  
446  
447  
448  
449  
450  
451  
452  
453  
454  
455  
456  
457  
458  
459  
460  
461  
462  
463  
464  
465  
466  
467  
468  
469  
470  
471  
472  
473  
474  
475  
476  
477  
478  
479  
480  
481  
482  
483  
484  
485  
486  
487  
488  
489  
490  
491  
492  
493  
494  
495  
496  
497  
498  
499  
500  
501  
502  
503  
504  
505  
506  
507  
508  
509  
510  
511  
512  
513  
514  
515  
516  
517  
518  
519  
520  
521  
522  
523  
524  
525  
526  
527  
528  
529  
530  
531  
532  
533  
534  
535  
536  
537  
538  
539  
540  
541  
542  
543  
544  
545  
546  
547  
548  
549  
550  
551  
552  
553  
554  
555  
556  
557  
558  
559  
560  
561  
562  
563  
564  
565  
566  
567  
568  
569  
570  
571  
572  
573  
574  
575  
576  
577  
578  
579  
580  
581  
582  
583  
584  
585  
586  
587  
588  
589  
590  
591  
592  
593  
594  
595  
596  
597  
598  
599  
600  
601  
602  
603  
604  
605  
606  
607  
608  
609  
610  
611  
612  
613  
614  
615  
616  
617  
618  
619  
620  
621  
622  
623  
624  
625  
626  
627  
628  
629  
630  
631  
632  
633  
634  
635  
636  
637  
638  
639  
640  
641  
642  
643  
644  
645  
646  
647  
648  
649  
650  
651  
652  
653  
654  
655  
656  
657  
658  
659  
660  
661  
662  
663  
664  
665  
666  
667  
668  
669  
670  
671  
672  
673  
674  
675  
676  
677  
678  
679  
680  
681  
682  
683  
684  
685  
686  
687  
688  
689  
690  
691  
692  
693  
694  
695  
696  
697  
698  
699  
700  
701  
702  
703  
704  
705  
706  
707  
708  
709  
710  
711  
712  
713  
714  
715  
716  
717  
718  
719  
720  
721  
722  
723  
724  
725  
726  
727  
728  
729  
730  
731  
732  
733  
734  
735  
736  
737  
738  
739  
740  
741  
742  
743  
744  
745  
746  
747  
748  
749  
750  
751  
752  
753  
754  
755  
756  
757  
758  
759  
760  
761  
762  
763  
764  
765  
766  
767  
768  
769  
770  
771  
772  
773  
774  
775  
776  
777  
778  
779  
780  
781  
782  
783  
784  
785  
786  
787  
788  
789  
790  
791  
792  
793  
794  
795  
796  
797  
798  
799  
800  
801  
802  
803  
804  
805  
806  
807  
808  
809  
810  
811  
812  
813  
814  
815  
816  
817  
818  
819  
820  
821  
822  
823  
824  
825  
826  
827  
828  
829  
830  
831  
832  
833  
834  
835  
836  
837  
838  
839  
840  
841  
842  
843  
844  
845  
846  
847  
848  
849  
850  
851  
852  
853  
854  
855  
856  
857  
858  
859  
860  
861  
862  
863  
864  
865  
866  
867  
868  
869  
870  
871  
872  
873  
874  
875  
876  
877  
878  
879  
880  
881  
882  
883  
884  
885  
886  
887  
888  
889  
890  
891  
892  
893  
894  
895  
896  
897  
898  
899  
900  
901  
902  
903  
904  
905  
906  
907  
908  
909  
910  
911  
912  
913  
914  
915  
916  
917  
918  
919  
920  
921  
922  
923  
924  
925  
926  
927  
928  
929  
930  
931  
932  
933  
934  
935  
936  
937  
938  
939  
940  
941  
942  
943  
944  
945  
946  
947  
948  
949  
950  
951  
952  
953  
954  
955  
956  
957  
958  
959  
960  
961  
962  
963  
964  
965  
966  
967  
968  
969  
970  
971  
972  
973  
974  
975  
976  
977  
978  
979  
980  
981  
982  
983  
984  
985  
986  
987  
988  
989  
990  
991  
992  
993  
994  
995  
996  
997  
998  
999  
1000

Observational studies, such as the RSS, provide a pragmatic approach when assessing drug effectiveness in a disease such as MS. Because MS disability accrues over decades, the cost effectiveness of disease modifying treatments cannot be assessed by short-term randomised controlled trials. However, observational studies are not without their own unique challenges. Identifying and validating models to predict the untreated outcome of treated cohorts is a crucial step to measuring the long-term benefits of MS treatments. MS is the commonest cause of progressive disability in the western world, thus identification of treatments that might significantly impact long-

1  
2  
3 term disability outcomes in MS could have major cost and quality of life benefits. Additionally, any  
4 models developed here would be readily transferable to other chronic diseases.  
5  
6

7  
8 The current model described here will form the basis for calculating the drug cost per QALY and for  
9 informing decisions on price adjustment in order to deliver the treatments cost effectively to UK MS  
10 patients in an ongoing manner. The model will be used to calculate the Hazard Ratio at which each  
11 product delivers efficacy against the NICE agreed cost per QALY and should any product fall short  
12 price reductions will be implemented by the DH.  
13  
14  
15

16  
17 Further work on repeated measures modelling, testing the models on other untreated appropriate MS  
18 datasets and identifying sensitivity analyses (such as the effect of drop outs, switching to a different  
19 class of DMT and the effects of treatments on backward transitions, i.e. disability improvements) are  
20 also planned.  
21  
22  
23  
24  
25  
26  
27  
28  
29  
30  
31  
32  
33  
34  
35  
36  
37  
38  
39  
40  
41  
42  
43  
44  
45  
46  
47  
48  
49  
50  
51  
52  
53  
54  
55  
56  
57  
58  
59  
60

1  
2  
3  
4 All authors 1) made substantial contributions to the conception and design, acquisition of data, or  
5 analysis and interpretation of data 2) were involved in drafting the article or revising it critically for  
6 important intellectual content and 3) were involved in the final approval of the version to be published.  
7  
8 JP is a clinical lead for the UK risk sharing scheme, inputs into the scientific advisory panel, was  
9 involved in the identification of the alternative dataset, interpretation of the analysis and was involved  
10 in the drafting and revising of the manuscript. TB is the senior statistician in the scheme and the  
11 analysis of this work, was involved in the drafting and revision of this manuscript. HT, FZ and JO were  
12 responsible for the preparation of the BCMS dataset, analysis of the data, and drafting and revision  
13 of the manuscript, MB was a clinical lead for the UK risk sharing scheme, input into the scientific  
14 advisory panel, was involved in the identification of the alternative dataset, interpretation of the  
15 analysis and was involved in the drafting and revising of the manuscript, MD is a clinical lead for the  
16 UK risk sharing scheme, inputs into the scientific advisory panel, was involved in the interpretation of  
17 the analysis and was involved in the drafting and revising of the manuscript, CD is a department of  
18 health advisor for the scheme, inputs into the scientific advisory panel, and was involved in the  
19 analysis of the data, its interpretation and was involved in the drafting and revising of the manuscript.  
20  
21  
22  
23  
24  
25  
26  
27  
28  
29  
30  
31  
32  
33  
34  
35  
36  
37  
38  
39  
40  
41  
42  
43  
44  
45  
46  
47  
48  
49  
50  
51  
52  
53  
54  
55  
56  
57  
58  
59  
60

### Acknowledgements

At the outset of the Risk-sharing Scheme agreement was reached between the UK Health Departments and the four manufacturers of the DMTs that all costs for this research project would be split 72 centres participated in the collection of data for the Risk-sharing Scheme from across the UK. Data was collected over a 10 year period and thus changes have been seen within the clinical teams. The authors are grateful to all the clinicians for the work undertaken at the centres which made the RSS possible. A list of the centres can be found at <http://www.mstrust.org.uk/research/risksharingscheme/>

The independent Scientific Advisory Group has been chaired by Prof Lilford and involved Prof Yoav Ben-shlomo, Prof Richard Gray and Prof Pelham Barton.

The MS Trust has performed an administrative coordinating role in the Risk-sharing Scheme and PAREXEL have performed the data collection from the sites and undertaken the analytical work.

The British Columbia MS (BCMS) database was created by Donald Paty FRCPC and Donald Studney MD FRCPC and maintained over the years by grants from various sources, including the MS Society of Canada, the MS/MRI Research Group, the US National MS Society and the Canadian Institutes of Health Research. We gratefully acknowledge the BC MS Clinic neurologists who contributed to the study through patient examination and data collection (current members listed here by primary clinic):

UBC MS Clinic: A. Traboulee, MD, FRCPC (UBC Hospital MS Clinic Director and Head of the UBC MS Programs); A-L. Sayao, MD, FRCPC; V. Devonshire, MD, FRCPC; S. Hashimoto, MD, FRCPC (UBC and Victoria MS Clinics); J. Hooge, MD, FRCPC (UBC and Prince George MS Clinic); L. Kastrukoff, MD, FRCPC (UBC and Prince George MS Clinic); J. Oger, MD, FRCPC; Kelowna MS Clinic: D. Adams, MD, FRCPC; D. Craig, MD, FRCPC; S. Meckling, MD, FRCPC; Prince George MS Clinic: L. Daly, MD, FRCPC ; Victoria MS Clinic: O. Hrebicek, MD, FRCPC; D. Parton, MD, FRCPC; K Atwell-Pope, MD, FRCPC. The views expressed in this paper do not necessarily reflect the views of each individual acknowledged.



1  
2  
3 The Corresponding Author has the right to grant on behalf of all authors and does grant on behalf of  
4 all authors, a worldwide licence to the Publishers and its licensees in perpetuity, in all forms, formats  
5 and media (whether known now or created in the future), to i) publish, reproduce, distribute, display  
6 and store the Contribution, ii) translate the Contribution into other languages, create adaptations,  
7 reprints, include within collections and create summaries, extracts and/or, abstracts of the  
8 Contribution, iii) create any other derivative work(s) based on the Contribution, iv) to exploit all  
9 subsidiary rights in the Contribution, v) the inclusion of electronic links from the Contribution to third  
10 party material where-ever it may be located; and, vi) licence any third party to do any or all of the  
11 above.  
12  
13  
14  
15  
16  
17  
18  
19  
20  
21  
22

23 **We have read and understood the BMJ Group policy on declaration of interests and declare**  
24 **the following interests:**  
25

26  
27 Jacqueline Palace serves on the scientific advisory board for Charcot Foundation, and has performed  
28 advisory work for Biogen Idec, Merck Serono Ltd, Bayer Schering Pharma, Novartis Pharmaceuticals  
29 UK Ltd, Teva Pharmaceutical Industries Ltd, Gilenya, Ono Pharmaceutical Co Ltd, Primary i-research,  
30 Chugai Pharma Europe and CI Consulting. She receives research support from the MS Society,  
31 QIDIS, Merck Serono Ltd, Novartis Pharmaceuticals and Bayer Schering Pharma, plus conference  
32 expenses from Novartis and Merck Serono Ltd.  
33  
34  
35  
36  
37  
38

39 Thomas Bregenzer –as an employee of PAREXEL International (Department of Biostatistics) has  
40 been working for numerous pharmaceutical companies, including those which are participating in the  
41 UK MS Risk Sharing Scheme. no financial interests to declare.  
42  
43  
44

45 Helen Tremlett is funded by the Multiple Sclerosis Society of Canada (Don Paty Career Development  
46 Award), Michael Smith Foundation for Health Research and is the Canada Research Chair for  
47 Neuroepidemiology and Multiple Sclerosis. She has received: research support from the US National  
48 Multiple Sclerosis Society, CIHR, and UK MS Trust; speaker honoraria and/or travel expenses to  
49 attend conferences from the Consortium of MS Centres, US National MS Society, the University of  
50 British Columbia Multiple Sclerosis Research Program, Bayer Pharmaceutical (speaker, 2010,  
51 honoraria declined), Teva Pharmaceuticals (speaker 2011), ECTRIMS (2011, 2012), UK MS Trust  
52  
53  
54  
55  
56  
57  
58  
59  
60

1  
2  
3 (2011), and the Chesapeake Health Education Program, US Veterans Affairs (2012, honorarium  
4 declined), Novartis Canada (2012) and the US National MS Society (2012, honorarium declined).

5  
6 Unless otherwise stated, all speaker honoraria are either donated to an MS charity or to an  
7  
8 unrestricted grant for use by her research group.  
9

10  
11 Joel Oger is funded by the University of British Columbia and has received grants and contracts from  
12 Biogen-Idec, Bayer, EMD Serono, Merk Serono. He has received speaker fees, Advisory Board  
13 membership and travel grants from Bayer, Novartis, Serono and the Ministry of Health of British  
14 Columbia. His lab is partially funded by the Christopher Foundation .  
15  
16

17  
18  
19 Feng Zhu – no financial interests to declare  
20

21  
22 Mike Boggild sits on advisory boards for Bio CSL, genzyme & Biogen Idec. Recieved sponsorship to  
23 attend international meetings from Novartis & BioCSL. Department has received funding to develop  
24 services from Biogen Idec, Genzyme and Novartis.  
25  
26

27  
28 Martin Duddy over the past 5 years MD has received speaker honoraria, consulting fees and travel  
29 grants from, Bayer, BiogenIdec, Novartis, Merck-Serono and Teva  
30  
31

32  
33 Charles Dobson – no financial interests to declare  
34  
35  
36

### 37 **Contributorship Statement**

38  
39 All authors 1) made substantial contributions to the conception and design, acquisition of data, or  
40 analysis and interpretation of data 2) were involved in drafting the article or revising it critically for  
41 important intellectual content and 3) were involved in the final approval of the version to be  
42 published.  
43  
44  
45  
46  
47

48  
49  
50 JP is a clinical lead for the UK risk sharing scheme, inputs into the scientific advisory panel, was  
51 involved in the identification of the alternative dataset, interpretation of the analysis and was  
52 involved in the drafting and revising of the manuscript. TB is the senior statistician in the scheme and  
53 the analysis of this work, was involved in the drafting and revision of this manuscript. HT, FZ and JO  
54  
55  
56  
57  
58  
59  
60

1  
2  
3 were responsible for the preparation of the BCMS dataset, analysis of the data, and drafting and  
4  
5 revision of the manuscript, MB was a clinical lead for the UK risk sharing scheme, input into the  
6  
7 scientific advisory panel, was involved in the identification of the alternative dataset, interpretation  
8  
9 of the analysis and was involved in the drafting and revising of the manuscript, MD is a clinical lead  
10  
11 for the UK risk sharing scheme, inputs into the scientific advisory panel, was involved in the  
12  
13 interpretation of the analysis and was involved in the drafting and revising of the manuscript, CD is a  
14  
15 department of health advisor for the scheme, inputs into the scientific advisory panel, and was  
16  
17 involved in the analysis of the data, its interpretation and was involved in the drafting and revising of  
18  
19 the manuscript.  
20  
21

### 22 23 **Data Sharing Statement**

24  
25  
26 The British Columbia MS database is held at the host institution and analysis and access to the data  
27  
28 is limited to on site access. More detailed analysis results are available on request to the  
29  
30 corresponding author.  
31  
32  
33  
34  
35  
36  
37  
38  
39  
40  
41  
42  
43  
44  
45  
46  
47  
48  
49  
50  
51  
52  
53  
54  
55  
56  
57  
58  
59  
60

## References

1. National Institute for Health and Care Excellence. Beta interferon and glatiramer acetate for the treatment of multiple sclerosis. NICE Technology Appraisal Guidance No. 32. London: NICE; 2002.
2. Department of Health. Cost effective provision of disease modifying therapies for people with multiple sclerosis. London: Health Service Circular 2002/004 London: Stationery Office; 2002.
3. Chilcott J, McCabe C, Tappenden P, O'Hagan A, Cooper NJ, Abrams K, et al. Modelling the cost-effectiveness of interferon beta and glatiramer acetate in the management of multiple sclerosis. *BMJ* 2003;326:522.
4. Hemmett L, Holmes J, Barnes M, Russell N. What drives quality of life in multiple sclerosis? *QJM*. 2004;97:671-6.
5. Kobelt G, Lindgren P, Parkin D, Francis DA, Johnson M, Bates D, et al. Costs and quality of life in multiple sclerosis. A cross-sectional observational study in the UK. *Scandinavian Working Papers in Economics*, 2000 (<http://swopec.hhs.se/hastef/papers/hastef0398.pdf> ; date accessed: 28-Aug-2013)
6. Boggild M, Palace J, Barton P, Ben-Shlomo Y, Bregenzer T, Dobson C, et al.. Multiple sclerosis risk sharing scheme: two year results of clinical cohort study with historical comparator. *BMJ* 2009;339:b4677.
7. The IFNB Multiple Sclerosis Study Group. Interferon beta-1b is effective in relapsing-remitting multiple sclerosis. I. Clinical results of a multicenter, randomized, double-blind, placebo-controlled trial. *Neurology*. 1993;43:655-61
8. Jacobs LD, Cookfair DL, Rudick RA, Herndon RM, Richert JR, Salazar AM, et al. Intramuscular interferon beta-1a for disease progression in relapsing multiple sclerosis. The Multiple Sclerosis Collaborative Research Group (MSCRG). *Ann Neurol*. 1996;39:285-94.
9. PRISMS (Prevention of Relapses and Disability by Interferon beta-1a Subcutaneously in Multiple Sclerosis) Study Group. Randomised double-blind placebo-controlled study of interferon beta-1a in relapsing/remitting multiple sclerosis. *Lancet*. 1998;352:1498-504.
10. Johnson KP, Brooks BR, Cohen JA, Ford CC, Goldstein J, Lisak RP, et al. Copolymer 1 reduces relapse rate and improves disability in relapsing-remitting multiple sclerosis: results of a phase III multicenter, double-blind placebo-controlled trial. The Copolymer 1 Multiple Sclerosis Study Group. *Neurology*. 1995;45:1268-76.
11. European Study Group on interferon beta-1b in secondary progressive MS. Placebo-controlled multicentre randomised trial of interferon beta-1b in treatment of secondary progressive multiple sclerosis. *Lancet*. 1998;352:1491-7.
12. Secondary Progressive Efficacy Clinical Trial of Recombinant Interferon-Beta-1a in MS (SPECTRIMS) Study Group. Randomized controlled trial of interferon-beta-1a in secondary progressive MS: Clinical results. *Neurology*. 2001;56:1496-504.
13. Tremlett H, Paty D, Devonshire V. Disability progression in MS is slower than previously reported. *Neurology* 2006;66:172-7.
14. Tremlett H, Zhao Y, Rieckmann P, Hutchinson M. New perspectives in the natural history of multiple sclerosis. *Neurology* 2010;74:2004-15.

15. Sadovnick AD, Ebers GC, Wilson RW, Paty DW. Life expectancy in patients attending multiple sclerosis clinics. *Neurology*. 1992;42:991-4.
16. Sweeney VP, Sadovnick AD, Brandeys V. Prevalence of multiple sclerosis in British Columbia. *Can J Neurol Sci*. 1986;13:47-51.
17. Poser CM, Paty DW, Scheinberg L, McDonald WI, Davis FA, Ebers GC, et al. New diagnostic criteria for multiple sclerosis: guidelines for research protocols. *Ann Neurol*. 1983;13:227-31.
18. Craig BA, Sendi PP. Estimation of the transition matrix of a discrete-time Markov chain. *Health Econ*. 2002;11:33-42.
19. Jackson CH, Sharples LS, Thompson SG, Duffy SW, Couto E. Multistate Markov models for disease progression with classification error. *Journal of the Royal Statistical Society: Series D (The Statistician)* 2003;52:193-209.
20. Roxburgh RH, Seaman SR, Masterman T, Hensiek AE, Sawcer SJ, Vukusic S, et al. Multiple Sclerosis Severity Score: using disability and disease duration to rate disease severity. *Neurology*. 2005;64:1144-51.
21. Albert P. A Markov model for sequences of ordinal data from a relapsing-remitting disease. *Biometrics* 1994;50:51-60.
22. Bell C, Graham J, Earnshaw S, Oleen-Burkey M, Castelli-Haley J, Johnson K., Cost-effectiveness of four immunomodulatory therapies for relapsing-remitting multiple sclerosis: a Markov model based on long-term clinical data. *J Manag Care Pharm* 2007;13:245-61.
23. Mandel M., Betensky R., Estimating time-to-event from longitudinal ordinal data using random-effects Markov models: application to multiple sclerosis progression. *Biostatistics* 2008;9:750-64.
24. Shirani A, Zhao Y, Kingwell E, Rieckmann P, Tremlett H. Temporal trends of disability progression in multiple sclerosis: findings from British Columbia, Canada (1975-2009). *Mult Scler*. 2012;18:442-50.
25. Shirani A, Zhao Y, Karim ME, Evans C, Kingwell E, van der Kop ML, et al. Association between use of interferon beta and progression of disability in patients with relapsing-remitting multiple sclerosis. *JAMA*. 2012;308:247-56.
26. <http://www.bcstats.gov.bc.ca/StatisticsBySubject/Census.aspx> Specifically the 1986 Census.
27. Lourenco P, Shirani J, Saeedi J, Oger J, Schreiber W.E, the UBC MS Clinic Neurologists and Tremlett H. Oligoclonal bands and cerebrospinal fluid markers in multiple sclerosis associations with disease course and progression. *Multiple Sclerosis Journal* 2013 Apr;19(50):577-84.
28. [http://www.msif.org/includes/documents/cm\\_docs/2013/m/msif-atlas-of-ms-2013-report.pdf?f=1](http://www.msif.org/includes/documents/cm_docs/2013/m/msif-atlas-of-ms-2013-report.pdf?f=1)

1  
2  
3  
4  
5  
6  
7  
8  
9  
10  
11  
12  
13  
14  
15  
16  
17  
18  
19  
20  
21  
22  
23  
24  
25  
26  
27  
28  
29  
30  
31  
32  
33  
34  
35  
36  
37  
38  
39  
40  
41  
42  
43  
44  
45  
46  
47  
48  
49  
50  
51  
52  
53  
54  
55  
56  
57  
58  
59  
60

For peer review only

**Table 1: Characteristics of patients reaching the Association of British Neurologists criteria in the British Columbia MS database after 1980 (the ‘natural history’ untreated comparator cohort) and the Risk-sharing Scheme cohort.**

| Baseline (eligible for DMT)                                                    | BCMS<br>(1980-1995*)    | RSS full cohort<br>RSS analysis cohort**           |
|--------------------------------------------------------------------------------|-------------------------|----------------------------------------------------|
| <b>N</b>                                                                       | 898                     | 5610<br>4138                                       |
| <b>Females:</b> n (%)                                                          | 666 (74.2%)             | 4162 (74.2%)<br>3125 (75.5%)                       |
| <b>Age at baseline, years:</b> mean (SD; range) [years]                        | 37.2 (9.32; 18 - 69)    | 39.4 (9.05; 15 - 73)<br>38.4 (8.58; 18 - 73)       |
| <b>Age at onset of MS, years:</b> mean (SD; range)                             | 29.3 (8.65; 3 - 61)     | 30.5 (8.52; 5 - 68)<br>30.5 (8.38; 5 - 68)         |
| <b>Disease duration at baseline, years:</b> mean (SD; range) [years]           | 7.9 (6.89; 0.2 to 38.9) | 8.8 (7.47; 0 - 46)<br>7.7 (6.62; 0 - 41)           |
| <b>SPMS documented at baseline#</b> n (%)                                      | 141 (15.7%)             | 772 (13.8%)<br>-                                   |
| <b>Relapses in the last two-years prior to eligibility:</b> median (quartiles) | 2 (2 - 3)               | 3 (2 - 3)<br>3 (2 - 3)                             |
| <b>First eligible EDSS:</b> median (quartiles; range)                          | 2 (1, 3.5; 0-6.5)       | 3.5 (2.0, 5.0; 0 - 8.0)<br>3.0 (2.0, 4.0; 0 - 6.5) |

*‘Eligibility’ refers to the first time a patient fulfilled the ABN criteria*

*\*data was truncated to 1995 in the final models to minimize DMT exposure in the cohort*

*\*\* “analysis cohort” is the subset of patients eligible for the analysis (e.g., treated patients, at least one post-baseline EDSS available etc.)*

*#all were still DMT eligible*

RSS=Risk-sharing Scheme ; BCMS=British Columbia MS database; SD=standard deviation;  
 EDSS=Expanded disability status score ; DMT=disease modifying treatment

**Table 2: “Goodness of fit” statistics for the ten state\* disability (EDSS) Markov models**

| Description of each ten-state <sup>1</sup> disability model | Minus 2 log likelihood <sup>2</sup> x 1,000 | Prediction errors (years 1-10) <sup>3</sup> |      | Utility |
|-------------------------------------------------------------|---------------------------------------------|---------------------------------------------|------|---------|
|                                                             |                                             | Cells                                       | EDSS |         |
| No covariates                                               | 17.152                                      | 2.20                                        | 0.24 | 0.022   |
| One covariate models                                        |                                             |                                             |      |         |
| Age at onset, binary                                        | 17.458                                      | 1.39                                        | 0.09 | 0.009   |
| Age at onset, continuous                                    | 17.599                                      | 1.58                                        | 0.13 | 0.007   |
| MSSS at baseline, binary                                    | 17.460                                      | 1.41                                        | 0.10 | 0.008   |
| MSSS at baseline, continuous                                | 17.457                                      |                                             |      |         |
| Disease duration, binary                                    | 17.462                                      | 1.33                                        | 0.10 | 0.009   |
| Disease duration, continuous                                | 17.557                                      |                                             |      |         |
| Sex                                                         | 17.470                                      | 1.32                                        | 0.10 | 0.008   |
| Two covariates models                                       |                                             |                                             |      |         |
| Sex and age at onset, binary                                | 17.603                                      | 1.51                                        | 0.14 | 0.007   |
| Sex and age at onset, continuous                            | 17.618                                      |                                             |      |         |
| Age at onset and MSSS, binary                               | 17.609                                      | 1.53                                        | 0.14 | 0.007   |
| Age at onset and MSSS, continuous                           | 17.618                                      |                                             |      |         |
| Age at onset and disease duration, binary                   | 17.603                                      | 1.52                                        | 0.14 | 0.007   |
| Age at onset and disease duration, continuous               | 17.618                                      |                                             |      |         |

<sup>1</sup>the ten disability states refer to EDSS 0 to 9, i.e. EDSS 0 is “state 1”, EDSS 1 is “state 2” etc.

<sup>2</sup>log likelihood statistic as calculated by ‘msm’ module, see Jackson<sup>19</sup> for details; lower values implying a better model (to be compared within each class of models, e.g. one-covariate and two-covariate models)

EDSS= Expanded disability status score ; MSSS= Multiple sclerosis status score



1  
2  
3<sup>3</sup>Prediction errors, averaged over years 1-10, for (a) the EDSS distribution in individual cells, (b)  
4 average EDSS, (c) average utility (see definitions in the appendix 3, comparing the values predicted  
5 by the model with the “observed” values using the method of midpoint interpolation (see appendix 2).  
6  
7

8  
9 Primary goodness of fit statistic is -2 log likelihood; prediction errors have only been calculated for the  
10 binary versions of the individual models except for the “final” model with age at onset as covariate  
11 where prediction errors have been calculated for both versions.  
12  
13  
14  
15  
16  
17  
18  
19  
20  
21  
22  
23  
24  
25  
26  
27  
28  
29  
30  
31  
32  
33  
34  
35  
36  
37  
38  
39  
40  
41  
42  
43  
44  
45  
46  
47  
48  
49  
50  
51  
52  
53  
54  
55  
56  
57  
58  
59  
60

**Table 3: Transition matrices for the ten state disability (EDSS) Markov model with “age at onset” as binary covariate and annual transition probabilities**

| age at onset < 28 yrs |   |         |         |         |         |         |         |         |         |         |         |
|-----------------------|---|---------|---------|---------|---------|---------|---------|---------|---------|---------|---------|
| to EDSS               | 0 | 1       | 2       | 3       | 4       | 5       | 6       | 7       | 8       | 9       |         |
| from EDSS             | 0 | 0.68704 | 0.21102 | 0.07195 | 0.02236 | 0.00434 | 0.00136 | 0.00176 | 0.00012 | 0.00003 | 0.00000 |
|                       | 1 | 0.06122 | 0.67867 | 0.16643 | 0.06462 | 0.01698 | 0.00474 | 0.00667 | 0.00052 | 0.00014 | 0.00001 |
|                       | 2 | 0.01692 | 0.12656 | 0.59550 | 0.17291 | 0.04537 | 0.01842 | 0.02190 | 0.00182 | 0.00054 | 0.00005 |
|                       | 3 | 0.00620 | 0.05215 | 0.11647 | 0.54386 | 0.09452 | 0.05730 | 0.11480 | 0.01070 | 0.00366 | 0.00035 |
|                       | 4 | 0.00176 | 0.02251 | 0.06617 | 0.12107 | 0.48737 | 0.10090 | 0.16644 | 0.02621 | 0.00690 | 0.00067 |
|                       | 5 | 0.00055 | 0.00562 | 0.02915 | 0.05936 | 0.09153 | 0.47268 | 0.28098 | 0.03961 | 0.01910 | 0.00143 |
|                       | 6 | 0.00012 | 0.00141 | 0.00447 | 0.02516 | 0.03208 | 0.04241 | 0.72834 | 0.11509 | 0.04566 | 0.00525 |
|                       | 7 | 0.00001 | 0.00016 | 0.00052 | 0.00260 | 0.00730 | 0.00419 | 0.12197 | 0.68145 | 0.16286 | 0.01895 |
|                       | 8 | 0.00000 | 0.00001 | 0.00004 | 0.00030 | 0.00057 | 0.00053 | 0.01884 | 0.05747 | 0.86099 | 0.06124 |
|                       | 9 | 0.00000 | 0.00000 | 0.00000 | 0.00002 | 0.00004 | 0.00004 | 0.00178 | 0.00596 | 0.17090 | 0.82125 |
| age at onset ≥ 28 yrs |   |         |         |         |         |         |         |         |         |         |         |
| to EDSS               | 0 | 1       | 2       | 3       | 4       | 5       | 6       | 7       | 8       | 9       |         |
| from EDSS             | 0 | 0.69537 | 0.20294 | 0.07251 | 0.02170 | 0.00422 | 0.00137 | 0.00175 | 0.00011 | 0.00003 | 0.00000 |
|                       | 1 | 0.05826 | 0.69501 | 0.15783 | 0.06088 | 0.01638 | 0.00458 | 0.00643 | 0.00048 | 0.00013 | 0.00001 |
|                       | 2 | 0.01586 | 0.12133 | 0.60789 | 0.16796 | 0.04458 | 0.01849 | 0.02159 | 0.00174 | 0.00052 | 0.00004 |
|                       | 3 | 0.00594 | 0.04960 | 0.12006 | 0.54422 | 0.09109 | 0.05845 | 0.11649 | 0.01030 | 0.00355 | 0.00030 |
|                       | 4 | 0.00165 | 0.02214 | 0.06660 | 0.11519 | 0.48935 | 0.10388 | 0.16811 | 0.02580 | 0.00671 | 0.00056 |
|                       | 5 | 0.00052 | 0.00533 | 0.02942 | 0.05866 | 0.08736 | 0.48695 | 0.27310 | 0.03880 | 0.01883 | 0.00102 |
|                       | 6 | 0.00012 | 0.00133 | 0.00444 | 0.02497 | 0.03069 | 0.04080 | 0.74069 | 0.10897 | 0.04377 | 0.00423 |
|                       | 7 | 0.00001 | 0.00015 | 0.00052 | 0.00247 | 0.00727 | 0.00385 | 0.11684 | 0.69269 | 0.16061 | 0.01559 |
|                       | 8 | 0.00000 | 0.00001 | 0.00004 | 0.00029 | 0.00055 | 0.00050 | 0.01881 | 0.05574 | 0.90340 | 0.02066 |
|                       | 9 | 0.00000 | 0.00000 | 0.00000 | 0.00002 | 0.00004 | 0.00003 | 0.00176 | 0.00568 | 0.17414 | 0.81832 |

1  
2  
3  
4  
5  
6  
7  
8 **UK Multiple Sclerosis Risk-sharing Scheme: a new natural history dataset and an improved**

9  
10 **Markov model**

11  
12  
13  
14  
15  
16  
17  
18  
19  
20  
21  
22  
23  
24  
25  
26  
27  
28  
29  
30  
31  
32  
33  
34  
35  
36  
37  
38  
39  
40  
41  
42  
43  
44  
45  
46  
47  
48  
49  
50  
51  
52  
53  
54  
55  
56  
57  
58  
59  
60

For peer review only

1  
2  
3  
4  
5  
6  
7  
8  
9  
10  
11  
12  
13  
14  
15  
16  
17  
18  
19  
20  
21  
22  
23  
24  
25  
26  
27  
28  
29  
30  
31  
32  
33  
34  
35  
36  
37  
38  
39  
40  
41  
42  
43  
44  
45  
46  
47  
48  
49  
50  
51  
52  
53  
54  
55  
56  
57  
58  
59  
60

The lead author\* affirms that this manuscript is an honest, accurate, and transparent account of the study being reported; that no important aspects of the study have been omitted; and that any discrepancies from the study as planned (and, if relevant, registered) have been explained.

For peer review only

1  
2  
3 The Corresponding Author has the right to grant on behalf of all authors and does grant on behalf of  
4 all authors, a worldwide licence to the Publishers and its licensees in perpetuity, in all forms, formats  
5 and media (whether known now or created in the future), to i) publish, reproduce, distribute, display  
6 and store the Contribution, ii) translate the Contribution into other languages, create adaptations,  
7 reprints, include within collections and create summaries, extracts and/or, abstracts of the  
8 Contribution, iii) create any other derivative work(s) based on the Contribution, iv) to exploit all  
9 subsidiary rights in the Contribution, v) the inclusion of electronic links from the Contribution to third  
10 party material where-ever it may be located; and, vi) licence any third party to do any or all of the  
11 above.  
12  
13  
14  
15  
16  
17  
18  
19  
20  
21  
22  
23  
24  
25

26 **We have read and understood the BMJ Group policy on declaration of interests and declare**  
27 **the following interests:**  
28

29  
30 Jacqueline Palace serves on the scientific advisory board for Charcot Foundation, and has performed  
31 advisory work for Biogen Idec, Merck Serono Ltd, Bayer Schering Pharma, Novartis Pharmaceuticals  
32 UK Ltd, Teva Pharmaceutical Industries Ltd, Gilenya, Ono Pharmaceutical Co Ltd, Primary i-research,  
33 Chugai Pharma Europe and CI Consulting. She receives research support from the MS Society,  
34 QIDIS, Merck Serono Ltd, Novartis Pharmaceuticals and Bayer Schering Pharma, plus conference  
35 expenses from Novartis and Merck Serono Ltd.  
36  
37  
38  
39  
40  
41

42 Thomas Bregenzer –as an employee of PAREXEL International (Department of Biostatistics) has  
43 been working for numerous pharmaceutical companies, including those which are participating in the  
44 UK MS Risk Sharing Scheme. no financial interests to declare.  
45  
46  
47

48 Helen Tremlett is funded by the Multiple Sclerosis Society of Canada (Don Paty Career Development  
49 Award), Michael Smith Foundation for Health Research and is the Canada Research Chair for  
50 Neuroepidemiology and Multiple Sclerosis. She has received: research support from the US National  
51 Multiple Sclerosis Society, CIHR, and UK MS Trust; speaker honoraria and/or travel expenses to  
52 attend conferences from the Consortium of MS Centres, US National MS Society, the University of  
53 British Columbia Multiple Sclerosis Research Program, Bayer Pharmaceutical (speaker, 2010,  
54  
55  
56  
57  
58  
59  
60

1  
2  
3 honoraria declined), Teva Pharmaceuticals (speaker 2011),ECTRIMS (2011, 2012), UK MS Trust  
4 (2011), and the Chesapeake Health Education Program, US Veterans Affairs (2012, honorarium  
5 declined), Novartis Canada (2012) and the US National MS Society (2012, honorarium declined).  
6  
7

8 Unless otherwise stated, all speaker honoraria are either donated to an MS charity or to an  
9 unrestricted grant for use by her research group.  
10  
11

12  
13 Joel Oger is funded by the University of British Columbia and has received grants and contracts from  
14 Biogen-Idec, Bayer, EMD Serono, Merk Serono. He has received speaker fees, Advisory Board  
15 membership and travel grants from Bayer, Novartis, Serono and the Ministry of Health of British  
16 Columbia. His lab is partially funded by the Christopher Foundation .  
17  
18  
19

20  
21 Feng Zhu – no financial interests to declare  
22

23  
24 Mike Boggild sits on advisory boards for Bio CSL, genzyme & Biogen Idec. Recieved sponsorship to  
25 attend international meetings from Novartis & BioCSL. Department has received funding to develop  
26 services from Biogen Idec, Genzyme and Novartis.  
27  
28

29  
30 Martin Duddy over the past 5 years MD has received speaker honoraria, consulting fees and travel  
31 grants from, Bayer, BiogenIdec, Novartis, Merck-Serono and Teva  
32  
33

34  
35 Charles Dobson – no financial interests to declare  
36  
37  
38  
39  
40  
41  
42  
43  
44  
45  
46  
47  
48  
49  
50  
51  
52  
53  
54  
55  
56  
57  
58  
59  
60

## **Abstract**

**Objectives:** In 2002, the UK's National Institute for Health and Care Excellence concluded that the multiple sclerosis (MS) disease modifying therapies; interferon- $\beta$  and glatiramer acetate, were not cost-effective over the short term but recognised that reducing disability over the longer-term might dramatically improve the cost-effectiveness. The UK Risk-sharing Scheme (RSS) was established to ensure cost-effective provision by prospectively collecting disability-related data from UK treated MS patients and comparing findings to a natural history (untreated) cohort. However, deficiencies were found in the originally selected untreated cohort and the resulting analytical approach. This study aims to identify a more suitable natural history comparator cohort and to develop a robust analytical approach using the new cohort

**Design:** The Scientific Advisory Group review, recommended the British Columbia Multiple Sclerosis (BCMS) database, Canada, as providing a more suitable natural history comparator cohort. Transition probabilities were derived and different Markov models (discrete and continuous) with and without baseline covariates were applied.

**Setting:** MS clinics and analysis groups in Canada and the UK.

**Participants:** From the BCMS database, 898 'untreated' MS patients considered eligible for drug treatment based on the UK's Association of British Neurologists criteria.

**Outcome measure:** The predicted disability, as measured by the Expanded Disability Status Scale (EDSS) score was collected and assessed for goodness of fit when compared to actual outcome.

**Results:** The BCMS untreated cohort contributed 7335 EDSS scores over a median 6.4 years (6357 "transitions" where EDSS values were recorded at consecutive visits) during the study period (1980-1995). A continuous Markov model with "age at onset" as a binary covariate was deemed the most suitable model for future RSS analysis.

**Conclusion:** A new untreated MS cohort from British Columbia, Canada has been selected and will be modelled using a continuous Markov model with age as a baseline covariate. This approach will now be applied to the treated UK RSS MS cohort for future price adjustment calculations.

### Strengths and limitations of this study

#### Strengths of this study:

- Identification of a new natural history cohort for the UKRSS, consisting of untreated MS patients in an era when disease-modifying drugs for MS were not available, minimizing potential selection bias
- Identification and validation of a Markov model for disease progression in MS which can be applied to data collected in clinical practice over multiple years of follow up.
- The identification of an analytical model which can use data collected at any time point within the follow up period.

#### Limitations of this study:

- The study related to observational data collected in clinical practice; unseen or unmeasured confounding cannot be adjusted for.
- Different techniques to assess effectiveness of drugs in observational studies such as matching on propensity scores cannot be directly compared to this methodology.



## Introduction

In January 2002, the UK's National Institute of Health and Care Excellence (NICE) opted not to recommend the use of the disease modifying therapies (DMTs) interferon- $\beta$  and glatiramer acetate for multiple sclerosis (MS) on the basis of cost-effectiveness analyses using data derived from the pivotal 2-3 year randomised controlled trials.<sup>1</sup> However, they recognised that uncertainties over the assumptions made in the modelling could unpredictably influence the long-term estimates of cost effectiveness. Thus in February 2002 the UK's Department of Health launched the 'Risk-sharing Scheme' (RSS)<sup>2</sup> with a circular entitled the "Cost effective provision of disease modifying therapies for people with multiple sclerosis" in collaboration with the Association of British Neurologists (ABN), the MS Trust, the MS Society and the pharmaceutical companies manufacturing interferon- $\beta$  and glatiramer acetate. Between 2002 and 2005 the scheme enrolled over 5,000 MS patients initiating a DMT in the UK, with the aim of measuring their disability annually over a ten year period.

The principle In the RSS is to use a Markov model to predict, for each DMT separately, the expected movement of patients between the EDSS states both "on" and "off" treatment. For patients "off" treatment, the model uses a matrix of transition probabilities derived from the actual progressions seen in the 'natural history' comparator cohort. These transition matrices are modified for patients "on" treatment by multiplying by the hazard ratio (relative rate of disease progression) derived separately for each DMT from the pivotal randomized controlled clinical trials. The model then predicts how the distribution of patients will evolve over a 20-year horizon, starting with the actual distribution at baseline for the primary analysis RSS cohort. Comparing the average observed loss of utility (average utility-weighted disease progression) for patients in the RSS to the expected loss calculated by the Markov model for patients "on" treatment; it is calculated as follows. The *expected* 'benefit' of treatment (with a specific DMT) is the "hypothetical" difference between the expected outcome without treatment and with treatment, as calculated in each case from the Markov model. The *actual* 'benefit' of treatment is the "observed" difference between the expected outcome without treatment and the actual outcome with treatment. The 'deviation' of the actual benefit from the expected is the primary outcome measure and calculated as a percentage of the expected benefit. This measure can have negative or positive values so that a negative deviation implies that the observed benefit was greater than predicted, a positive deviation suggesting that it was worse than

1  
2  
3 predicted and a value of 0 indicating that it was exactly as predicted. A positive deviation beyond the  
4 level agreed (confidential and individual between each pharmaceutical company and the Department  
5 of Health) would lead to a price adjustment down to achieve the target cost effectiveness. Details can  
6 be found in the Health Service Circular<sup>2</sup>.  
7  
8  
9

10  
11 The original cost effectiveness model<sup>3</sup> produced a target outcome based upon transition probabilities  
12 obtained from a pre-existing natural history (DMT naive) cohort of patients from London, Ontario,  
13 Canada along with hazard ratios from the pivotal randomised control trials (unpublished data provided  
14 to the Department of Health by the manufacturers). Complementary quality of life data collected by  
15 the MS Trust<sup>4</sup> and cost data from Kobelt et al<sup>5</sup> were used to populate the cost-effectiveness model.  
16  
17 The targets ensured that the UK's National Health Service benchmark of £36,000 (46,000 Euro /  
18 56,000 US dollars) per quality adjusted life year (QALY) was reached over a 20 year projection,  
19 based on a planned 10 year follow up period within the RSS with 2 yearly interim analyses. Before  
20 being allowed to enter the scheme, the costs of each drug was assessed against the NICE bench  
21 mark over a 20 year time horizon. Price reductions were implemented to ensure each product  
22 reached the target cost per QALY using the original NICE calculations<sup>3</sup>, an average 13.7% price  
23 reduction was achieved for the NHS at the outset of the Scheme.  
24  
25  
26  
27  
28  
29  
30  
31  
32  
33

34 The two year analysis revealed significant inconsistencies in a number of sensitivity analyses.<sup>6</sup>  
35 Depending on the underlying assumptions, some analyses suggested that observed disability  
36 progression in the treated cohort was worse than that predicted from the historical untreated cohort  
37 while others demonstrated the contrary effect. A detrimental effect of DMT did not match the  
38 described effect on short term, 2-3 year, disability seen in the randomised placebo controlled trials.<sup>7-12</sup>  
39  
40 With the predetermined analytical approach (based on a discrete Markov model) appearing to  
41 produce unreliable results with wide variation, a decision was made to postpone any decision on cost  
42 effectiveness to allow for a reappraisal of the process and to reconsider whether the statistical models  
43 and control data chosen were "fit for purpose."  
44  
45  
46  
47  
48  
49  
50

51 In retrospect, both the control data set and analysis model selected, when setting up the RSS, were  
52 found to have intrinsic flaws that made them unsuitable for the task.<sup>6</sup> The natural history cohort (from  
53 London, Ontario, Canada) was unexpectedly found to contain retrospectively smoothed disability data  
54 (rather than actual, real-time collected disability scores), censoring any improvement in EDSS.  
55  
56  
57  
58  
59  
60

1  
2  
3 Comparing our uncensored treated cohort to data retrospectively smoothed in this way would have  
4 the effect of unpredictably underestimating any treatment effect. In addition, individual-level patient  
5 data were not available from the London, Ontario cohort, which prevented precise baseline matching  
6 between the two cohorts, limiting our validation of the underlying (Markov) model for disease  
7 progression. Furthermore, there were only 342 patients matching the ABN prescribing criteria from  
8 which to generate the models.  
9

10  
11 This paper outlines the development of a more appropriate analysis plan and the choice of a cohort fit  
12 for the needs of the scheme. The method described will be applied in the 4 and 6 year cost-  
13 effectiveness analyses. The analysis plan was approved by the scheme's independent Scientific  
14 Advisory Group in December 2012 in advance of unlocking the newly collected 4 and 6 year UK Risk-  
15 sharing Scheme data planned for autumn 2013.  
16  
17  
18  
19  
20  
21  
22  
23

## 24 **Methods**

### 25 Identification of a new multiple sclerosis natural history dataset

26  
27  
28  
29  
30  
31 The Scientific Advisory Group undertook a detailed examination of all the available dataset through  
32 literature reviews, expert opinion, discussion with the clinical leads for the RSS and discussion with  
33 the Sylvia Lawry Centre for Multiple Sclerosis Research, Germany (<http://www.slcmr.net>). Selection  
34 criteria included availability of Expanded Disability Status Scale (EDSS) score measurements and  
35 access to the unprocessed (actual) scores (i.e. no data smoothing or other data manipulation). Other  
36 factors considered were size of the database, prospective data collection and length of follow-up, and  
37 the broader setting such as a close match to the UK in terms of the health system and MS prevalence  
38 in the underlying population. Whilst no single perfect dataset existed the British Columbia Multiple  
39 Sclerosis (BCMS) database, Canada (est. 1980) was identified as the best natural history comparator  
40 cohort for our purposes.<sup>13,14</sup> In this dataset – as in the RSS – actual EDSS scores were recorded  
41 prospectively. It is estimated to capture 80% of the BC MS population<sup>15,16</sup> and as such is considered  
42 representative of the wider MS population. EDSS scores were recorded by MS specialist neurologists  
43 after a face-to-face consultation with the patient; this typically occurred at the annual MS clinic visit.  
44 Patient data was not truncated if secondary-progressive MS was reached; i.e. all relapse-onset MS  
45 patients and their respective EDSS scores were considered eligible. By 2004, the database had  
46  
47  
48  
49  
50  
51  
52  
53  
54  
55  
56  
57  
58  
59  
60

1  
2  
3 records for over 5900 patients spanning 28 years (>25,000 cumulative years) of prospective follow-  
4  
5 up. Until 1996 DMTs were not widely available in British Columbia.  
6  
7

8 Patient and data selection from the BCMS database.  
9

10  
11 In order to generate relevant data for our needs, patients were only selected from the BCMS  
12  
13 database if they fulfilled the 2001 Association of British Neurologists (ABN) criteria for interferon- $\beta$  and  
14  
15 glatiramer acetate (IFN-  $\beta$ /GA) use (adapted from Appendix IV Health Service Circular 2002/004),  
16  
17 defined as: EDSS $\leq$ 6.5;  $\geq$ 18 years old; two relapses in the last 2 calendar years.  
18

19  
20 Baseline for each patient was the 'first eligibility date,' meaning the first date at which a patient fulfilled  
21  
22 the ABN eligibility criteria. Only patients with definite MS (Poser criteria<sup>17</sup>) and a minimum of two  
23  
24 EDSS scores at least 9 months apart were considered.  
25

26 In order to be comparable with the RSS data the following adjustments and selection were applied:  
27

28 1) EDSS scores taken during a relapse or when disability was affected by other factors considered  
29  
30 largely unrelated to MS (e.g. hip fracture) were excluded.  
31

32  
33 2) For the original discrete Markov model (see below) as well as visual presentation of the yearly  
34  
35 descriptive data (see under results), annual EDSS scores were needed. However, as is typical in  
36  
37 clinical practice, not all visits / EDSS assessments occurred at exactly yearly intervals and the  
38  
39 exclusion of some EDSS scores (e.g. due to a relapse or hip fracture) also affected the availability of  
40  
41 a yearly score. Therefore, data was selected such that only EDSS scores one year apart (+/- three  
42  
43 calendar months) were considered. See appendix 1 for further details.  
44

45 3) For the continuous Markov model, (see below) all eligible EDSS scores were used regardless of  
46  
47 their measurement interval i.e. no yearly data selection, as in (2), was needed.  
48

49 4) All patient data was truncated to the end of 1995 (i.e. the last full year in which the DMTs were not  
50  
51 widely available in BC Although initially it was planned to truncate individual patient profiles only once  
52  
53 a DMT was initiated (in order to maximise the number of EDSS assessments), even when this  
54  
55 extended past 1995 when treatment would have been available). It became apparent that this  
56  
57  
58  
59  
60

1  
2  
3 introduced a bias into the data, likely related to 'indication bias,' whereby patients 'doing well' would  
4  
5 be less likely to start a DMT.  
6

### 7 Analysis

8  
9  
10 The primary purpose of the analytical work was to find the best statistical model able to predict EDSS  
11  
12 progression in a natural history cohort based on entry demographic and clinical data. The following  
13  
14 models were applied in the current study and their performances were critically evaluated.  
15

16 a) The discrete Markov model<sup>18</sup> as in the original 2 year analysis<sup>6</sup> i.e. disability scores (EDSS) had to  
17  
18 be measured at discrete, fixed time points.  
19

20  
21 b) A continuous Markov model allowing for EDSS scores to be collected at **any time, i.e. at any**  
22  
23 unevenly spaced time intervals, as is typical in clinical practice.<sup>19</sup> Such a model also allowed  
24  
25 covariates to be included. This model allows for more complete use of EDSS scores collected at  
26  
27 irregular time intervals both in the BCMS and RSS cohorts.  
28

29 With regard to the "MS course" (i.e. relapsing remitting vs. secondary progressive) as a potential  
30  
31 covariate, we did not distinguish between these disease states when developing the Markov models  
32  
33 because secondary progressive MS is simply a later stage of the relapsing remitting form of the  
34  
35 disease and the transition has considerable overlap.  
36

### 37 Predicting outcomes in the continuous Markov model (b)

38  
39  
40 A multi-state model algorithm ('R' library 'msm'<sup>19</sup>) allows the EDSS distribution to be predicted at any  
41  
42 time  $t$ . See appendix 2 for further details).  
43  
44

45  
46  
47 **To keep computations feasible, only integer EDSS values were used and fractional values rounded**  
48  
49 **down (i.e. EDSS 1.5 was scored as 1, 2.5 was scored as 2 etc.). Moreover, 'msm' as a tool for *multi-***  
50  
51 ***state modelling* requires a consecutive numbering of (disease) states, starting with "1". Therefore the**  
52  
53 **(rounded down) EDSS 0 became 'state 1', EDSS 1 'state 2' etc., leading to the ten EDSS 'states' (1–**  
54  
55 **10) representing EDSS 0–9. Transition probability and intensity matrices as the output of these**  
56  
57 **models were then used to predict disease progression in terms of EDSS as follows.**  
58  
59  
60

### *Covariates considered in the models*

The selection of potential covariates by the scientific advisory group was based upon; (a) those which were reliably and consistently recorded in both the BCMS and the RSS database and (b) *a priori* knowledge of those associated with the outcome of disability progression. As a result, sex, age at MS symptom onset, as well as disease duration and disability (EDSS) – combined into a Multiple Sclerosis Severity Score (MSSS)<sup>20</sup> were tested in the continuous Markov model with up to two covariates. In addition, for the more promising models an alternative model was considered with dichotomous covariates (split at the median) replacing the continuous variables. This has the advantage that the resulting model can be formulated as the aggregate of a small number of discrete Markov models, so computations can be carried out without requiring special software, especially since the EDSS values in the RSS have been collected at strict yearly intervals, as opposed to the BCMS data which was based on routine clinical practice, and therefore do not necessitate a continuous model.

Critical evaluation of the models was performed using the following validation techniques, with the goal being to identify the most appropriate model to represent the natural progression of MS. See appendix 3 for further details.

- 1) Transition probabilities derived from the complete eligible, BCMS natural history data were applied to the baseline data to predict outcomes over the subsequent 10 years to assess how well it matched the observed data from which the model was derived.
- 2) The BCMS dataset was repeatedly randomly divided into two subsets of equal size, with one half only being used to derive transition probabilities (as in #1). The probabilities derived from this half were then applied to the baseline characteristics of the second half, generating a model whose goodness of fit could be judged against the actual, observed 10 year disability data of this second half.

### Measuring Goodness of Fit

1  
2  
3 Goodness of fit was assessed via visual inspection of the graphical displays as well as numerically.  
4  
5 These included progression over time (mean EDSS profiles) for the cohort as a whole as well as  
6  
7 comparisons with the proportions in a particular EDSS state over time.  
8

9  
10 For the numerical assessment a classical mean square prediction error (weighted root mean square  
11  
12 over years of the prediction error in the average quantity shown, weighted by the number of patients  
13  
14 contributing data in the given year) and the likelihood, resulting from the maximum likelihood  
15  
16 algorithm were calculated for each of the covariate models to allow comparison.

17  
18 This study was approved by the University of British Columbia's Clinical Research Ethics Board (H08-  
19  
20 01544)

## 21 22 **Results**

### 23 24 Data Description

25  
26  
27 The baseline demographics showed the BCMS and RSS cohorts to be remarkably well matched.  
28  
29 Patient characteristics are shown in table 1.

30  
31  
32 The natural history BCMS comparator dataset comprised of 898 patient profiles with 7335 EDSS  
33  
34 scores providing 6357 transitions between consecutive EDSS states, i.e 6357 'events' where EDSS  
35  
36 values were recorded at consecutive visits. In any given "transition," a patient's EDSS could increase,  
37  
38 decrease or stay the same

### 39 40 Discrete Markov model

41  
42  
43 When applying the discrete Markov model to the BCMS reference data, the goodness of fit was  
44  
45 unsatisfactory, underestimating EDSS in earlier years and overestimating in later years (see figure 1).  
46  
47 Consequently, the discrete Markov model was no longer considered appropriate, and development of  
48  
49 a continuous Markov model was pursued.

### 50 51 Continuous Markov models

52  
53  
54 The following continuous 10 state Markov models (EDSS 0 to 9), with and without covariates, were  
55  
56 evaluated:

- 57  
58 1. Model without covariates

- 1
- 2
- 3 2. One covariate model with age at onset\*
- 4 3. One covariate model with MSSS\* at baseline
- 5
- 6 4. One covariate model with disease duration\* at baseline
- 7
- 8 5. One covariate model with sex
- 9
- 10 6. Two covariate model: sex and age at onset\*
- 11 7. Two covariate model: MSSS\* at baseline and age at onset\*
- 12 8. Two covariate model: disease duration\* at baseline and age at onset\*
- 13 - \*two variants were implemented: continuous (original) data and a 'binary' version with the
- 14 median used for categorisation.
- 15
- 16

17 There was a systematic deviation with a slight overestimation when the continuous Markov model  
18 without covariates was applied (figure 2). Hence this model was not considered further.

19  
20  
21 After validation was repeated for all covariate models (table 2), it was noted that inclusion of a second  
22 covariate did not reveal any additional benefits. With one covariate, the model with "age at onset" as a  
23 binary covariate (median: 28 years) was selected because it displayed the smallest -2 log likelihood  
24 and minimal EDSS prediction error, see table 2. Further, the goodness of fit was acceptable when  
25 comparing the predicted and observed EDSS profiles, as shown in Figure 3a. A more detailed  
26 comparison of observed and expected proportions 'per EDSS state' is shown in Figure 3b which  
27 confirmed that no systematic deviations were present which might otherwise have been cancelled out  
28 when only looking at an average EDSS profile. It was concluded that only random fluctuation  
29 remained, and a systematic deviation was no longer visible. When comparing figure 1 with figures 2  
30 or 3 it should be noted that the former is based on the *annual* EDSS data which were obtained as  
31 described in Appendix 1 while figures 2 and 3 show the EDSS at any time  $t$ , i.e. not necessarily when  
32 an observation was recorded (while the continuous Markov model takes into account all observations  
33 at any time  $t$  it is not straightforward to define what the 'observed EDSS' at any time  $t$  is in a graphic  
34 representation; for details on how to define and calculate what is the observed EDSS at a given time  
35 see Appendix 2).

36  
37  
38 Using this 'best' model, transition probabilities were extracted from half of the BCMS cohort and  
39 applied to the other half. This gave good predictions, with the mean EDSS profiles (observed versus  
40 predicted) being similar to each other and to those of the entire cohort.  
41  
42  
43  
44  
45  
46  
47  
48  
49  
50  
51  
52  
53  
54  
55  
56  
57  
58  
59  
60



1  
2  
3 In summary, the continuous Markov model with a single covariate - onset age - was considered the  
4 model of choice to be used in future RSS analysis. The respective transition matrices are presented in  
5  
6 Table 3.  
7  
8

### 9 **Discussion**

10  
11 This paper outlines the successful identification of a more suitable natural history cohort for the UK  
12 MS risk-sharing scheme, with the British Columbia, Canada dataset now replacing the London,  
13 Ontario, Canada cohort in the RSS analysis plan. The analytical work is based on a Markov model  
14 which has been frequently used for ordinal data from relapsing (remitting) diseases, especially  
15 MS.<sup>21,22,23</sup>  
16  
17

18  
19  
20  
21  
22 Further, because use of the British Columbian data has now allowed access to a richer dataset,  
23 including full access to original, 'real-time' disability (EDSS) assessments, as well as individual  
24 patient-level, we have been able to explore and develop more appropriate approaches. Specifically,  
25 we were able to employ more advanced statistical models, making use of all the available data and  
26 including clinically relevant patient-level characteristics as covariates in order to identify the most  
27 accurate predictive model to be applied to the RSS. Finally, we observed that to minimize 'indication  
28 bias' in relation to initiation of a DMT in the natural history cohort (British Columbia), censoring (data  
29 truncation) was more appropriate at the population (rather than individual) level.  
30  
31

32  
33  
34  
35  
36  
37 Findings from our validation procedures indicate future feasibility with respect to obtaining reliable  
38 cost-effectiveness results in the upcoming 6 year RSS analyses. For instance, visualisation of the  
39 predicted and observed outcomes in the final model showed almost perfect overlap, with a one-  
40 covariate model, with no additional improvements from introducing further covariates. In addition, the  
41 final model was able to predict accurately the MS disease course (disability) in half of the cohort  
42 (randomly selected) having obtained the transition probabilities from the other half. These  
43 observations along with the baseline comparability of the BCMS and the RSS cohorts suggest the  
44 transition probabilities from the BCMS cohort within this model can be used to predict the untreated  
45 progression of patients in the RSS.  
46  
47

48  
49  
50  
51  
52  
53  
54  
55 An additional strength of this continuous model is the ability to include all valid disability (EDSS)  
56 assessments, regardless of their exact timing, maximising data usage. We acknowledge the potential  
57  
58  
59  
60

1  
2  
3 limitations of using of a historical control from a geographically discrete population. It is possible that  
4 the natural history of MS has changed over time or that the BCMS population is not representative of  
5 a UK one. However, in British Columbia, it has been previously shown that disability progression (as  
6 measured by the EDSS) has not substantially changed overtime (1980-2009<sup>24</sup>). Further, we have  
7 previously shown that the use of a 'contemporary' untreated control cohort – i.e. where patients are  
8 potentially eligible for a DMT in an era when the DMTs are readily available, but remain untreated - is  
9 subject to indication bias and thus a historical control cohort, with data collected pre-DMT use, is likely  
10 to be more appropriate.<sup>25</sup> Although we are proposing using a dataset from Canada (as was the  
11 original RSS natural history dataset) and cannot rule out differences between the BCMS patients and  
12 the UK RSS cohort, we are reassured that the baseline features are comparable except baseline  
13 EDSS, but in the underlying Markov model we calculate the transition probabilities between EDSS  
14 'states', and different baseline EDSS distributions would only matter if baseline EDSS as such had a  
15 prognostic value, which doesn't seem to be the case when we were looking at the rates of EDSS  
16 progression stratified by EDSS at baseline. In addition, the underlying ethnicity of the two jurisdictions  
17 was similar; around the time of the cohort selection in British Columbia, 30.2% of the population self-  
18 identified as British and within the wider BCMS database, >90% were Caucasian,<sup>26,27</sup> which is  
19 comparable to the UK cohort. Both cohorts may have enrolled a small number of patients with  
20 neuromyelitis optica (we estimate this to be less than 0.5% of the total<sup>28</sup>) because the availability of  
21 the antibody assay occurred after 2007 (and after enrolment to the RSS scheme). An additional  
22 limitation is the potential for different ways of measuring the EDSS scores between the BCMS and the  
23 UK RSS cohorts because of changes in how the EDSS is interpreted over time and also because of  
24 differences in the physicians performing the assessments.

25  
26  
27  
28  
29  
30  
31  
32  
33  
34  
35  
36  
37  
38  
39  
40  
41  
42  
43  
44  
45  
46  
47  
48  
49  
50  
51  
52  
53  
54  
55  
56  
57  
58  
59  
60

Observational studies, such as the RSS, provide a pragmatic approach when assessing drug effectiveness in a disease such as MS. Because MS disability accrues over decades, the cost effectiveness of disease modifying treatments cannot be assessed by short-term randomised controlled trials. However, observational studies are not without their own unique challenges.

Identifying and validating models to predict the untreated outcome of treated cohorts is a crucial step to measuring the long-term benefits of MS treatments. MS is the commonest cause of progressive disability in the western world, thus identification of treatments that might significantly impact long-

1  
2  
3 term disability outcomes in MS could have major cost and quality of life benefits. Additionally, any  
4  
5 models developed here would be readily transferable to other chronic diseases.  
6

7  
8 The current model described here will form the basis for calculating the drug cost per QALY and for  
9  
10 informing decisions on price adjustment in order to deliver the treatments cost effectively to UK MS  
11 patients in an ongoing manner. The model will be used to calculate the Hazard Ratio at which each  
12  
13 product delivers efficacy against the NICE agreed cost per QALY and should any product fall short  
14  
15 price reductions will be implemented by the DH.  
16

17  
18 Further work on repeated measures modelling, testing the models on other untreated appropriate MS  
19  
20 datasets and identifying sensitivity analyses (such as the effect of drop outs, switching to a different  
21  
22 class of DMT and the effects of treatments on backward transitions, i.e. disability improvements) are  
23  
24 also planned.  
25  
26  
27  
28  
29  
30  
31  
32  
33  
34  
35  
36  
37  
38  
39  
40  
41  
42  
43  
44  
45  
46  
47  
48  
49  
50  
51  
52  
53  
54  
55  
56  
57  
58  
59  
60

1  
2  
3 All authors 1) made substantial contributions to the conception and design, acquisition of data, or  
4 analysis and interpretation of data 2) were involved in drafting the article or revising it critically for  
5 important intellectual content and 3) were involved in the final approval of the version to be published.  
6  
7 JP is a clinical lead for the UK risk sharing scheme, inputs into the scientific advisory panel, was  
8 involved in the identification of the alternative dataset, interpretation of the analysis and was involved  
9 in the drafting and revising of the manuscript. TB is the senior statistician in the scheme and the  
10 analysis of this work, was involved in the drafting and revision of this manuscript. HT, FZ and JO were  
11 responsible for the preparation of the BCMS dataset, analysis of the data, and drafting and revision  
12 of the manuscript, MB was a clinical lead for the UK risk sharing scheme, input into the scientific  
13 advisory panel, was involved in the identification of the alternative dataset, interpretation of the  
14 analysis and was involved in the drafting and revising of the manuscript, MD is a clinical lead for the  
15 UK risk sharing scheme, inputs into the scientific advisory panel, was involved in the interpretation of  
16 the analysis and was involved in the drafting and revising of the manuscript, CD is a department of  
17 health advisor for the scheme, inputs into the scientific advisory panel, and was involved in the  
18 analysis of the data, its interpretation and was involved in the drafting and revising of the manuscript.  
19  
20  
21  
22  
23  
24  
25  
26  
27  
28  
29  
30  
31  
32  
33  
34  
35  
36  
37  
38  
39  
40  
41  
42  
43  
44  
45  
46  
47  
48  
49  
50  
51  
52  
53  
54  
55  
56  
57  
58  
59  
60

## Acknowledgements

At the outset of the Risk-sharing Scheme agreement was reached between the UK Health Departments and the four manufacturers of the DMTs that all costs for this research project would be split 72 centres participated in the collection of data for the Risk-sharing Scheme from across the UK. Data was collected over a 10 year period and thus changes have been seen within the clinical teams. The authors are grateful to all the clinicians for the work undertaken at the centres which made the RSS possible. A list of the centres can be found at <http://www.mstrust.org.uk/research/risksharingscheme/>

The independent Scientific Advisory Group has been chaired by Prof Lilford and involved Prof Yoav Ben-shlomo, Prof Richard Gray and Prof Pelham Barton.

The MS Trust has performed an administrative coordinating role in the Risk-sharing Scheme and PAREXEL have performed the data collection from the sites and undertaken the analytical work.

The British Columbia MS (BCMS) database was created by Donald Paty FRCPC and Donald Studney MD FRCPC and maintained over the years by grants from various sources, including the MS Society of Canada, the MS/MRI Research Group, the US National MS Society and the Canadian Institutes of Health Research. We gratefully acknowledge the BC MS Clinic neurologists who contributed to the study through patient examination and data collection (current members listed here by primary clinic):

UBC MS Clinic: A. Traboulee, MD, FRCPC (UBC Hospital MS Clinic Director and Head of the UBC MS Programs); A-L. Sayao, MD, FRCPC; V. Devonshire, MD, FRCPC; S. Hashimoto, MD, FRCPC (UBC and Victoria MS Clinics); J. Hooge, MD, FRCPC (UBC and Prince George MS Clinic); L. Kastrukoff, MD, FRCPC (UBC and Prince George MS Clinic); J. Oger, MD, FRCPC; Kelowna MS Clinic: D. Adams, MD, FRCPC; D. Craig, MD, FRCPC; S. Meckling, MD, FRCPC; Prince George MS Clinic: L. Daly, MD, FRCPC ; Victoria MS Clinic: O. Hrebicek, MD, FRCPC; D. Parton, MD, FRCPC; K Atwell-Pope, MD, FRCPC. The views expressed in this paper do not necessarily reflect the views of each individual acknowledged.

1  
2  
3  
4  
5  
6  
7  
8  
9  
10  
11  
12  
13  
14  
15  
16  
17  
18  
19  
20  
21  
22  
23  
24  
25  
26  
27  
28  
29  
30  
31  
32  
33  
34  
35  
36  
37  
38  
39  
40  
41  
42  
43  
44  
45  
46  
47  
48  
49  
50  
51  
52  
53  
54  
55  
56  
57  
58  
59  
60

For peer review only

## References

1. National Institute for Health and Care Excellence. Beta interferon and glatiramer acetate for the treatment of multiple sclerosis. NICE Technology Appraisal Guidance No. 32. London: NICE; 2002.
2. Department of Health. Cost effective provision of disease modifying therapies for people with multiple sclerosis. London: Health Service Circular 2002/004 London: Stationery Office; 2002.
3. Chilcott J, McCabe C, Tappenden P, O'Hagan A, Cooper NJ, Abrams K, et al. Modelling the cost-effectiveness of interferon beta and glatiramer acetate in the management of multiple sclerosis. *BMJ* 2003;326:522.
4. Hemmett L, Holmes J, Barnes M, Russell N. What drives quality of life in multiple sclerosis? *QJM*. 2004;97:671-6.
5. Kobelt G, Lindgren P, Parkin D, Francis DA, Johnson M, Bates D, et al. Costs and quality of life in multiple sclerosis. A cross-sectional observational study in the UK. *Scandinavian Working Papers in Economics*, 2000 (<http://swopec.hhs.se/hastef/papers/hastef0398.pdf> ; date accessed: 28-Aug-2013)
6. Boggild M, Palace J, Barton P, Ben-Shlomo Y, Bregenzer T, Dobson C, et al.. Multiple sclerosis risk sharing scheme: two year results of clinical cohort study with historical comparator. *BMJ* 2009;339:b4677.
7. The IFNB Multiple Sclerosis Study Group. Interferon beta-1b is effective in relapsing-remitting multiple sclerosis. I. Clinical results of a multicenter, randomized, double-blind, placebo-controlled trial. *Neurology*. 1993;43:655-61
8. Jacobs LD, Cookfair DL, Rudick RA, Herndon RM, Richert JR, Salazar AM, et al. Intramuscular interferon beta-1a for disease progression in relapsing multiple sclerosis. The Multiple Sclerosis Collaborative Research Group (MSCRG). *Ann Neurol*. 1996;39:285-94.
9. PRISMS (Prevention of Relapses and Disability by Interferon beta-1a Subcutaneously in Multiple Sclerosis) Study Group. Randomised double-blind placebo-controlled study of interferon beta-1a in relapsing/remitting multiple sclerosis. *Lancet*. 1998;352:1498-504.
10. Johnson KP, Brooks BR, Cohen JA, Ford CC, Goldstein J, Lisak RP, et al. Copolymer 1 reduces relapse rate and improves disability in relapsing-remitting multiple sclerosis: results of a phase III multicenter, double-blind placebo-controlled trial. The Copolymer 1 Multiple Sclerosis Study Group. *Neurology*. 1995;45:1268-76.
11. European Study Group on interferon beta-1b in secondary progressive MS. Placebo-controlled multicentre randomised trial of interferon beta-1b in treatment of secondary progressive multiple sclerosis. *Lancet*. 1998;352:1491-7.
12. Secondary Progressive Efficacy Clinical Trial of Recombinant Interferon-Beta-1a in MS (SPECTRIMS) Study Group. Randomized controlled trial of interferon-beta-1a in secondary progressive MS: Clinical results. *Neurology*. 2001;56:1496-504.
13. Tremlett H, Paty D, Devonshire V. Disability progression in MS is slower than previously reported. *Neurology* 2006;66:172-7.
14. Tremlett H, Zhao Y, Rieckmann P, Hutchinson M. New perspectives in the natural history of multiple sclerosis. *Neurology* 2010;74:2004-15.

15. Sadovnick AD, Ebers GC, Wilson RW, Paty DW. Life expectancy in patients attending multiple sclerosis clinics. *Neurology*. 1992;42:991-4.
16. Sweeney VP, Sadovnick AD, Brandeys V. Prevalence of multiple sclerosis in British Columbia. *Can J Neurol Sci*. 1986;13:47-51.
17. Poser CM, Paty DW, Scheinberg L, McDonald WI, Davis FA, Ebers GC, et al. New diagnostic criteria for multiple sclerosis: guidelines for research protocols. *Ann Neurol*. 1983;13:227-31.
18. Craig BA, Sendi PP. Estimation of the transition matrix of a discrete-time Markov chain. *Health Econ*. 2002;11:33-42.
19. Jackson CH, Sharples LS, Thompson SG, Duffy SW, Couto E. Multistate Markov models for disease progression with classification error. *Journal of the Royal Statistical Society: Series D (The Statistician)* 2003;52:193-209.
20. Roxburgh RH, Seaman SR, Masterman T, Hensiek AE, Sawcer SJ, Vukusic S, et al. Multiple Sclerosis Severity Score: using disability and disease duration to rate disease severity. *Neurology*. 2005;64:1144-51.
21. Albert P. A Markov model for sequences of ordinal data from a relapsing-remitting disease. *Biometrics* 1994;50:51-60.
22. Bell C, Graham J, Earnshaw S, Oleen-Burkey M, Castelli-Haley J, Johnson K., Cost-effectiveness of four immunomodulatory therapies for relapsing-remitting multiple sclerosis: a Markov model based on long-term clinical data. *J Manag Care Pharm* 2007;13:245-61.
23. Mandel M., Betensky R., Estimating time-to-event from longitudinal ordinal data using random-effects Markov models: application to multiple sclerosis progression. *Biostatistics* 2008;9:750-64.
24. Shirani A, Zhao Y, Kingwell E, Rieckmann P, Tremlett H. Temporal trends of disability progression in multiple sclerosis: findings from British Columbia, Canada (1975-2009). *Mult Scler*. 2012;18:442-50.
25. Shirani A, Zhao Y, Karim ME, Evans C, Kingwell E, van der Kop ML, et al. Association between use of interferon beta and progression of disability in patients with relapsing-remitting multiple sclerosis. *JAMA*. 2012;308:247-56.
26. <http://www.bcstats.gov.bc.ca/StatisticsBySubject/Census.aspx> Specifically the 1986 Census.
27. Lourenco P, Shirani J, Saeedi J, Oger J, Schreiber W.E, the UBC MS Clinic Neurologists and Tremlett H. Oligoclonal bands and cerebrospinal fluid markers in multiple sclerosis associations with disease course and progression. *Multiple Sclerosis Journal* 2013 Apr;19(50):577-84.
28. [http://www.msif.org/includes/documents/cm\\_docs/2013/m/msif-atlas-of-ms-2013-report.pdf?f=1](http://www.msif.org/includes/documents/cm_docs/2013/m/msif-atlas-of-ms-2013-report.pdf?f=1)



1  
2  
3  
4  
5  
6  
7  
8  
9  
10  
11  
12  
13  
14  
15  
16  
17  
18  
19  
20  
21  
22  
23  
24  
25  
26  
27  
28  
29  
30  
31  
32  
33  
34  
35  
36  
37  
38  
39  
40  
41  
42  
43  
44  
45  
46  
47  
48  
49  
50  
51  
52  
53  
54  
55  
56  
57  
58  
59  
60

For peer review only

**Table 1: Characteristics of patients reaching the Association of British Neurologists criteria in the British Columbia MS database after 1980 (the 'natural history' untreated comparator cohort) and the Risk-sharing Scheme cohort.**

| Baseline (eligible for DMT)                                                    | BCMS<br>(1980-1995*)    | RSS full cohort<br><br>RSS analysis cohort**       |
|--------------------------------------------------------------------------------|-------------------------|----------------------------------------------------|
| <b>N</b>                                                                       | 898                     | 5610<br>4138                                       |
| <b>Females: n (%)</b>                                                          | 666 (74.2%)             | 4162 (74.2%)<br>3125 (75.5%)                       |
| <b>Age at baseline, years: mean (SD; range) [years]</b>                        | 37.2 (9.32; 18 - 69)    | 39.4 (9.05; 15 - 73)<br>38.4 (8.58; 18 - 73)       |
| <b>Age at onset of MS, years: mean (SD; range)</b>                             | 29.3 (8.65; 3 - 61)     | 30.5 (8.52; 5 - 68)<br>30.5 (8.38; 5 - 68)         |
| <b>Disease duration at baseline, years: mean (SD; range) [years]</b>           | 7.9 (6.89; 0.2 to 38.9) | 8.8 (7.47; 0 - 46)<br>7.7 (6.62; 0 - 41)           |
| <b>SPMS documented at baseline# n (%)</b>                                      | 141 (15.7%)             | 772 (13.8%)<br>-                                   |
| <b>Relapses in the last two-years prior to eligibility: median (quartiles)</b> | 2 (2 - 3)               | 3 (2 - 3)<br>3 (2 - 3)                             |
| <b>First eligible EDSS: median (quartiles; range)</b>                          | 2 (1, 3.5; 0-6.5)       | 3.5 (2.0, 5.0; 0 - 8.0)<br>3.0 (2.0, 4.0; 0 - 6.5) |

*'Eligibility' refers to the first time a patient fulfilled the ABN criteria*

*\*data was truncated to 1995 in the final models to minimize DMT exposure in the cohort*

*\*\* "analysis cohort" is the subset of patients eligible for the analysis (e.g., treated patients, at least one post-baseline EDSS available etc.)*

*#all were still DMT eligible*

RSS=Risk-sharing Scheme ; BCMS=British Columbia MS database; SD=standard deviation;  
EDSS=Expanded disability status score ; DMT=disease modifying treatment

**Table 2: “Goodness of fit” statistics for the ten state\* disability (EDSS) Markov models**

| Description of each ten-state <sup>1</sup> disability model | Minus 2 log likelihood <sup>2</sup> x 1,000 | Prediction errors (years 1-10) <sup>3</sup> |      | Utility |
|-------------------------------------------------------------|---------------------------------------------|---------------------------------------------|------|---------|
|                                                             |                                             | Cells                                       | EDSS |         |
| No covariates                                               | 17.152                                      | 2.20                                        | 0.24 | 0.022   |
| One covariate models                                        |                                             |                                             |      |         |
| Age at onset, binary                                        | 17.458                                      | 1.39                                        | 0.09 | 0.009   |
| Age at onset, continuous                                    | 17.599                                      | 1.58                                        | 0.13 | 0.007   |
| MSSS at baseline, binary                                    | 17.460                                      | 1.41                                        | 0.10 | 0.008   |
| MSSS at baseline, continuous                                | 17.457                                      |                                             |      |         |
| Disease duration, binary                                    | 17.462                                      | 1.33                                        | 0.10 | 0.009   |
| Disease duration, continuous                                | 17.557                                      |                                             |      |         |
| Sex                                                         | 17.470                                      | 1.32                                        | 0.10 | 0.008   |
| Two covariates models                                       |                                             |                                             |      |         |
| Sex and age at onset, binary                                | 17.603                                      | 1.51                                        | 0.14 | 0.007   |
| Sex and age at onset, continuous                            | 17.618                                      |                                             |      |         |
| Age at onset and MSSS, binary                               | 17.609                                      | 1.53                                        | 0.14 | 0.007   |
| Age at onset and MSSS, continuous                           | 17.618                                      |                                             |      |         |
| Age at onset and disease duration, binary                   | 17.603                                      | 1.52                                        | 0.14 | 0.007   |
| Age at onset and disease duration, continuous               | 17.618                                      |                                             |      |         |

<sup>1</sup>the ten disability states refer to EDSS 0 to 9, i.e. EDSS 0 is “state 1”, EDSS 1 is “state 2” etc.

<sup>2</sup>log likelihood statistic as calculated by ‘msm’ module, see Jackson<sup>19</sup> for details; lower values implying a better model (to be compared within each class of models, e.g. one-covariate and two-covariate models)

EDSS= Expanded disability status score ; MSSS= Multiple sclerosis status score

1  
2  
3 <sup>3</sup>Prediction errors, averaged over years 1-10, for (a) the EDSS distribution in individual cells, (b)  
4 average EDSS, (c) average utility (see definitions in the appendix 3, comparing the values predicted  
5 by the model with the “observed” values using the method of midpoint interpolation (see appendix 2).  
6  
7

8  
9 Primary goodness of fit statistic is -2 log likelihood; prediction errors have only been calculated for the  
10 binary versions of the individual models except for the “final” model with age at onset as covariate  
11 where prediction errors have been calculated for both versions.  
12  
13  
14  
15  
16  
17  
18  
19  
20  
21  
22  
23  
24  
25  
26  
27  
28  
29  
30  
31  
32  
33  
34  
35  
36  
37  
38  
39  
40  
41  
42  
43  
44  
45  
46  
47  
48  
49  
50  
51  
52  
53  
54  
55  
56  
57  
58  
59  
60

**Table 3: Transition matrices for the ten state disability (EDSS) Markov model with “age at onset” as binary covariate and annual transition probabilities**

| age at onset < 28 yrs |   |         |         |         |         |         |         |         |         |         |         |
|-----------------------|---|---------|---------|---------|---------|---------|---------|---------|---------|---------|---------|
| to EDSS               | 0 | 1       | 2       | 3       | 4       | 5       | 6       | 7       | 8       | 9       |         |
| from EDSS             | 0 | 0.68704 | 0.21102 | 0.07195 | 0.02236 | 0.00434 | 0.00136 | 0.00176 | 0.00012 | 0.00003 | 0.00000 |
|                       | 1 | 0.06122 | 0.67867 | 0.16643 | 0.06462 | 0.01698 | 0.00474 | 0.00667 | 0.00052 | 0.00014 | 0.00001 |
|                       | 2 | 0.01692 | 0.12656 | 0.59550 | 0.17291 | 0.04537 | 0.01842 | 0.02190 | 0.00182 | 0.00054 | 0.00005 |
|                       | 3 | 0.00620 | 0.05215 | 0.11647 | 0.54386 | 0.09452 | 0.05730 | 0.11480 | 0.01070 | 0.00366 | 0.00035 |
|                       | 4 | 0.00176 | 0.02251 | 0.06617 | 0.12107 | 0.48737 | 0.10090 | 0.16644 | 0.02621 | 0.00690 | 0.00067 |
|                       | 5 | 0.00055 | 0.00562 | 0.02915 | 0.05936 | 0.09153 | 0.47268 | 0.28098 | 0.03961 | 0.01910 | 0.00143 |
|                       | 6 | 0.00012 | 0.00141 | 0.00447 | 0.02516 | 0.03208 | 0.04241 | 0.72834 | 0.11509 | 0.04566 | 0.00525 |
|                       | 7 | 0.00001 | 0.00016 | 0.00052 | 0.00260 | 0.00730 | 0.00419 | 0.12197 | 0.68145 | 0.16286 | 0.01895 |
|                       | 8 | 0.00000 | 0.00001 | 0.00004 | 0.00030 | 0.00057 | 0.00053 | 0.01884 | 0.05747 | 0.86099 | 0.06124 |
|                       | 9 | 0.00000 | 0.00000 | 0.00000 | 0.00002 | 0.00004 | 0.00004 | 0.00178 | 0.00596 | 0.17090 | 0.82125 |
| age at onset ≥ 28 yrs |   |         |         |         |         |         |         |         |         |         |         |
| to EDSS               | 0 | 1       | 2       | 3       | 4       | 5       | 6       | 7       | 8       | 9       |         |
| from EDSS             | 0 | 0.69537 | 0.20294 | 0.07251 | 0.02170 | 0.00422 | 0.00137 | 0.00175 | 0.00011 | 0.00003 | 0.00000 |
|                       | 1 | 0.05826 | 0.69501 | 0.15783 | 0.06088 | 0.01638 | 0.00458 | 0.00643 | 0.00048 | 0.00013 | 0.00001 |
|                       | 2 | 0.01586 | 0.12133 | 0.60789 | 0.16796 | 0.04458 | 0.01849 | 0.02159 | 0.00174 | 0.00052 | 0.00004 |
|                       | 3 | 0.00594 | 0.04960 | 0.12006 | 0.54422 | 0.09109 | 0.05845 | 0.11649 | 0.01030 | 0.00355 | 0.00030 |
|                       | 4 | 0.00165 | 0.02214 | 0.06660 | 0.11519 | 0.48935 | 0.10388 | 0.16811 | 0.02580 | 0.00671 | 0.00056 |
|                       | 5 | 0.00052 | 0.00533 | 0.02942 | 0.05866 | 0.08736 | 0.48695 | 0.27310 | 0.03880 | 0.01883 | 0.00102 |
|                       | 6 | 0.00012 | 0.00133 | 0.00444 | 0.02497 | 0.03069 | 0.04080 | 0.74069 | 0.10897 | 0.04377 | 0.00423 |
|                       | 7 | 0.00001 | 0.00015 | 0.00052 | 0.00247 | 0.00727 | 0.00385 | 0.11684 | 0.69269 | 0.16061 | 0.01559 |
|                       | 8 | 0.00000 | 0.00001 | 0.00004 | 0.00029 | 0.00055 | 0.00050 | 0.01881 | 0.05574 | 0.90340 | 0.02066 |
|                       | 9 | 0.00000 | 0.00000 | 0.00000 | 0.00002 | 0.00004 | 0.00003 | 0.00176 | 0.00568 | 0.17414 | 0.81832 |

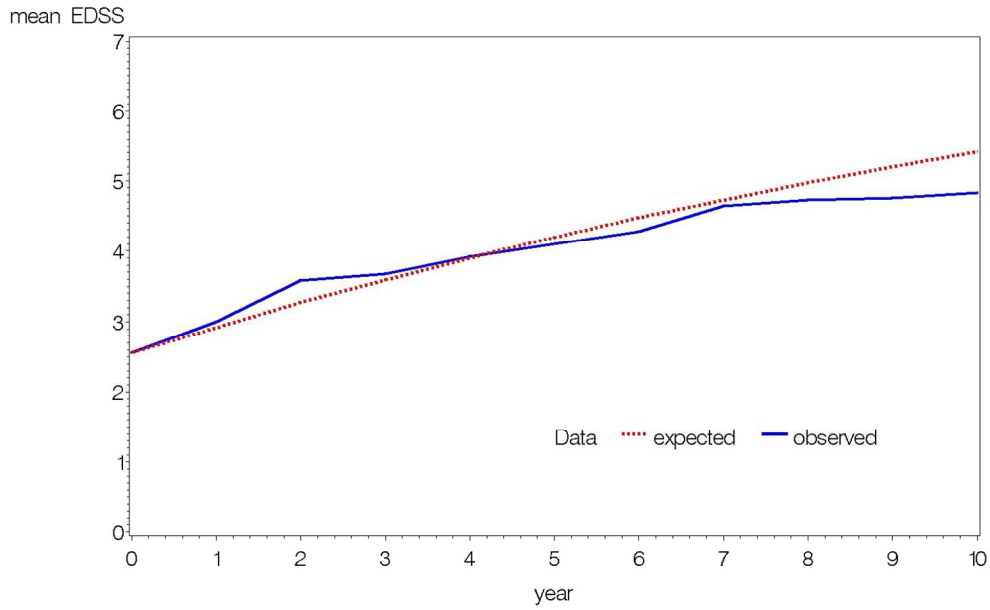

Transition probabilities obtained from the BCC dataset using the discrete Markov model were then applied to the baseline EDSS of the same cohort, projected over 10 years to produce a predicted mean EDSS outcome (red) and compared to the observed mean EDSS course of the cohort (blue).  
402x264mm (96 x 96 DPI)

View only

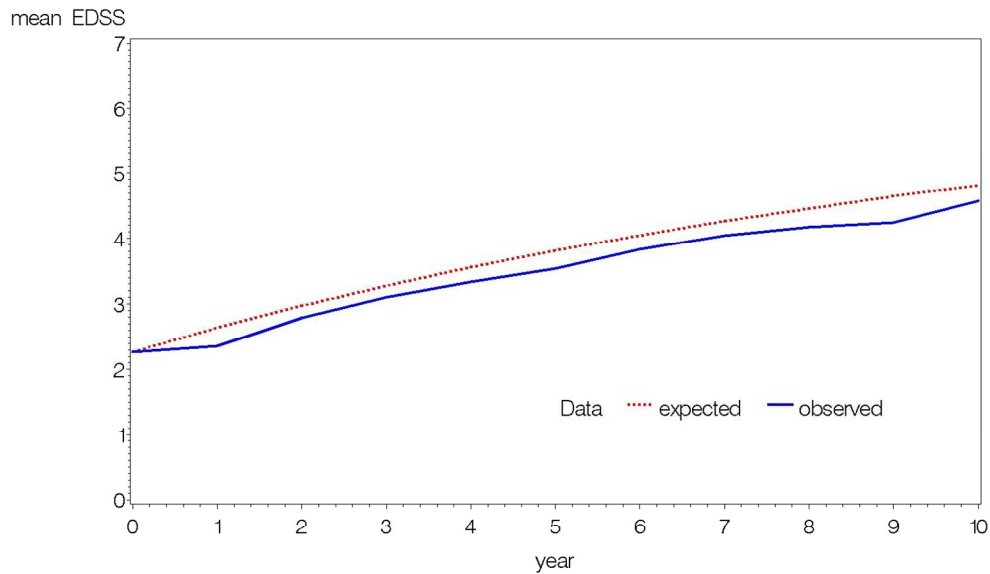

Figure 2: Transition probabilities obtained from the BCC dataset using the continuous Markov model were then applied to the baseline EDSS of the same cohort, projected over 10 years to produce a predicted mean EDSS outcome (red) and compared to the observed mean EDSS course of the cohort (blue).  
402x264mm (96 x 96 DPI)

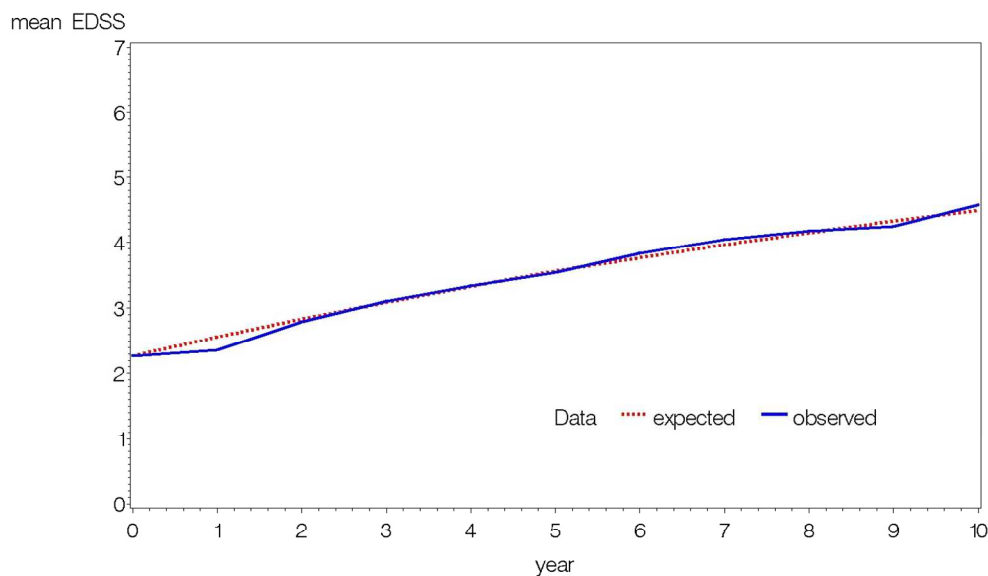

Figure 3: Transition probabilities obtained from the BCC dataset using the continuous Markov model with one covariate "age at onset" (binary version) were then applied to the baseline EDSS of the same cohort, projected over 10 years to produce a predicted outcome (red) compared to the observed course of the cohort (blue):

- a) Mean EDSS shown in the predicted and actual cohorts
- b) The proportion of patients predicted to be in each of the 10 EDSS states over time (state 1; EDSS 0, state 2; EDSS 1 and 1.5, state 3; EDSS 2.0 and 2.5, state 4; EDSS 3.0 and 3.5, state 5; EDSS 4.0 and 4.5, state 6; EDSS 5.0 and 5.5, state 7; EDSS 6.0 and 6.5, state 8; EDSS 7.0 and 7.5, state 9; EDSS 8.0 and 8.5, state 10; EDSS 9.0 and 9.5).

402x264mm (96 x 96 DPI)

only



1  
2  
3  
4  
5  
6  
7  
8  
9  
10  
11  
12  
13  
14  
15  
16  
17  
18  
19  
20  
21  
22  
23  
24  
25  
26  
27  
28  
29  
30  
31  
32  
33  
34  
35  
36  
37  
38  
39  
40  
41  
42  
43  
44  
45  
46  
47  
48  
49  
50  
51  
52  
53  
54  
55  
56  
57  
58  
59  
60

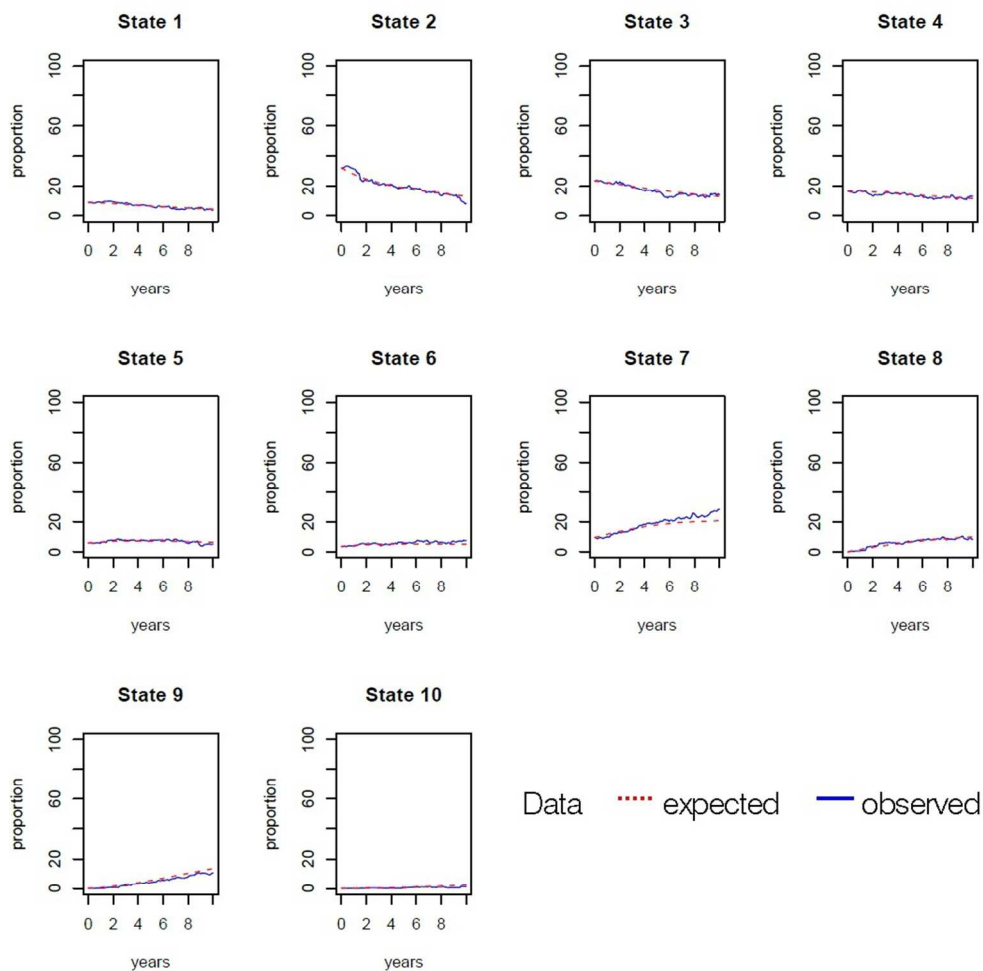

283x280mm (96 x 96 DPI)



### Appendix 1 EDSS data extraction from the BCMS database

For the discrete Markov model and for tabular display of annual data the EDSS data were extracted and processed as follows. If the baseline EDSS fell when it was not the 'usual' yearly visit period, then subsequent EDSS scores could be lost. To maximize the number of EDSS transitions per patient, but keeping the yearly (+/- three calendar months) interval, EDSS scores were also 'individualized' as follows: the baseline EDSS became the baseline year, within that year, we searched to find the optimal new, individualized baseline for which the patient would, over the coming years have the most number of yearly EDSS scores. For some patients, this new individualized baseline date would not coincide with a clinic visit and would therefore not have an EDSS score present. When a baseline EDSS was required (e.g. for the discrete Markov model), data was also 'shifted' such that each patient would have a baseline EDSS. This lag between baseline ('eligibility') and EDSS was considered consistent with clinical practice in that it is not unusual to have a lag time between a patient becoming eligible for treatment and actual treatment initiation.

### Appendix 2 Algorithms to forecast EDSS distributions at any given time

The 'msm' algorithm allows the EDSS distribution to be forecasted at any time  $t$ .<sup>19</sup> To define what is the actual EDSS at a given time  $t$  (i.e. not necessarily when an observation was recorded) 'msm' offered two variants: (i) the last observation carried forward (LOCF) for each individual patient, and (ii) a 'midpoint interpolation' algorithm in which the EDSS state for a given patient at time  $t$  was taken as the score closest in time to the actually observed EDSS. Suppose an individual was observed in EDSS states  $S_{r-1}$  and  $S_r$  at two consecutive times  $t_{r-1}$  and  $t_r$ , and we wanted to estimate "observed" proportions at a time  $t$  between  $t_{r-1}$  and  $t_r$ . LOCF then meant that individuals were assumed to be in state  $S_{r-1}$  at time  $t$ , the same state as they were at  $t_{r-1}$ . Midpoint interpolation meant if  $t \leq (t_{r-1} + t_r) / 2$ , the midpoint of  $t_{r-1}$  and  $t_r$ , the state at  $t$  was assumed to be  $S_{r-1}$ , otherwise  $S_r$ . Option (i) would be more appropriate if EDSS values were always measured immediately after each transition. Option (ii) would be more appropriate if EDSS values were measured at mixed time intervals ('fixed or random'). Option (ii) was considered to mimic the clinical setting more closely and is also appears more applicable in progressive diseases.<sup>19</sup> Therefore all results presented in this paper were based on this 'midpoint interpolation' approach.

For the continuous Markov model we limited the range of transitions which can be regarded as 'instantaneous' to +/- 3, which meant that at any time  $t$  an instantaneous progression (or improvement) into another EDSS state was only possible when not exceeding three consecutive states (an instantaneous transition from 1 to 2, 3, or 4 was possible, for example, whereas 1 to 5 was not). This restriction was recommended to avoid computationally inefficient modelling of hazard rates which were virtually 0.

### Appendix 3 Validation of the models

The following validation techniques were applied when evaluating the different Markov models.

1  
2  
3 The most straightforward method for the discrete Markov model consisted of applying the transition  
4 matrix (and the 2nd, 3rd etc. power) to the vector of the baseline EDSS distribution in the BCMS  
5 reference database, calculating the forecasted EDSS distribution for t=1, 2, 3... years and comparing  
6 against the actual EDSS. A similar validation was performed in the continuous Markov model, as  
7 described by Jackson.<sup>1</sup>  
8  
9

10 As a second validation we divided the BCMS dataset randomly into two subsets of equal size, using  
11 one half to derive the model separately for the two subgroups, and then assessing the goodness of  
12 fit in the other half of the dataset. Although Jackson<sup>19</sup> emphasises that “Assessing the goodness of  
13 fit of this class of models [...] is worth further research” we decided to use a classical mean square  
14 prediction error (weighted root mean square over years of the prediction error in the average  
15 quantity shown, weighted by the number of patients contributing data in the given year) to compare  
16 competing models. Moreover, the computed likelihood itself as a result of the maximum likelihood  
17 algorithm was used to rank the different one and two covariate models.  
18  
19  
20  
21  
22  
23  
24  
25  
26  
27  
28  
29  
30  
31  
32  
33  
34  
35  
36  
37  
38  
39  
40  
41  
42  
43  
44  
45  
46  
47  
48  
49  
50  
51  
52  
53  
54  
55  
56  
57  
58  
59  
60
